# Supplementary material for: A Novel PIFA/KOH Promoted Approach to Synthesize C2-arylacylated Benzothiazoles as Potential Drug Scaffolds
Source: MDPI journal article supplement (doi:10.3390/molecules27030726), 2022-01-22

## *Supporting Information*

# **A novel PIFA/KOH promoted approach to synthesize C2-arylacylated benzothiazoles as potential drug scaffolds**

Xiao-Tong Sun, Zhi-Gang Hu, Zhen Huang, Ling-Li Zhou and Jian-Quan Weng \*

*College of Chemical Engineering, Zhejiang University of Technology, Hangzhou 310014, P. R. China*

*\*E-mail: jqweng@zjut.edu.cn.*

## **Table of Contents**

|                                                  |           |
|--------------------------------------------------|-----------|
| <b>1. NMR Spectrum of compounds 3aa~3br.....</b> | <b>2</b>  |
| <b>2. NMR Spectrum of 1b.....</b>                | <b>40</b> |
| <b>3. GC-MS Spectrum of PhI.....</b>             | <b>41</b> |

## 1. NMR Spectrum of compounds 3aa~3br

### $^1\text{H}$ and $^{13}\text{C}$ NMR Spectra of 3aa

8.589  
8.587  
8.573  
8.570  
8.273  
8.258  
8.047  
8.033  
7.708  
7.706  
7.703  
7.695  
7.691  
7.687  
7.679  
7.676  
7.673  
7.625  
7.622  
7.611  
7.608  
7.600  
7.595  
7.592  
7.584  
7.568  
7.554  
7.551

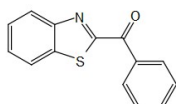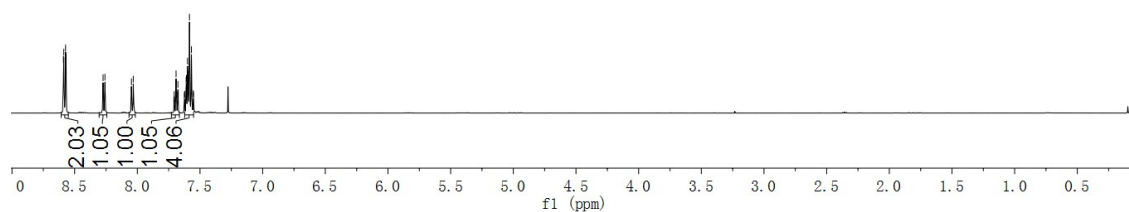

185.40  
167.17  
153.94  
137.06  
135.03  
133.91  
131.31  
128.53  
127.64  
126.95  
125.77  
122.19

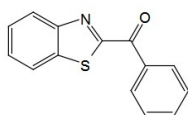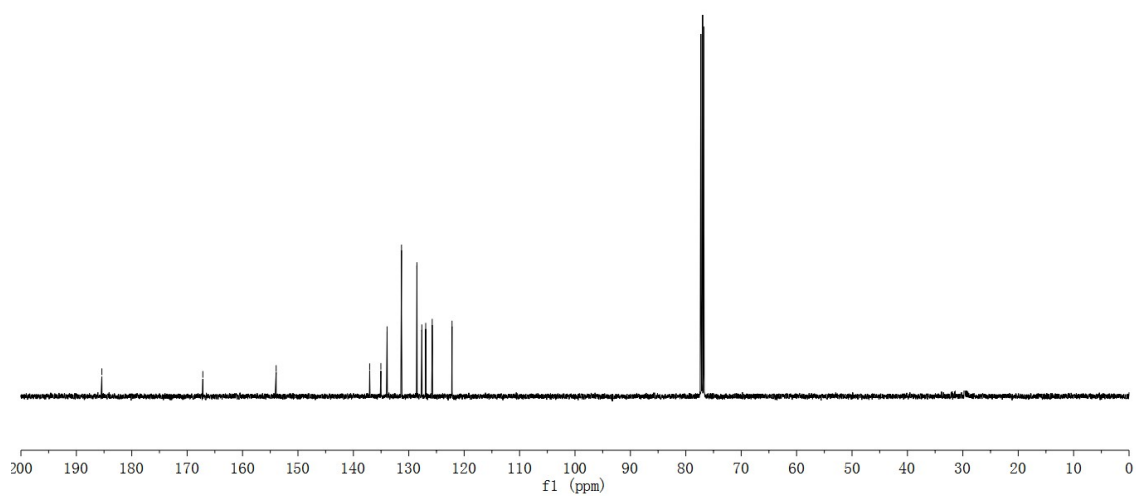

# <sup>1</sup>H and <sup>13</sup>C NMR Spectra of 3ab

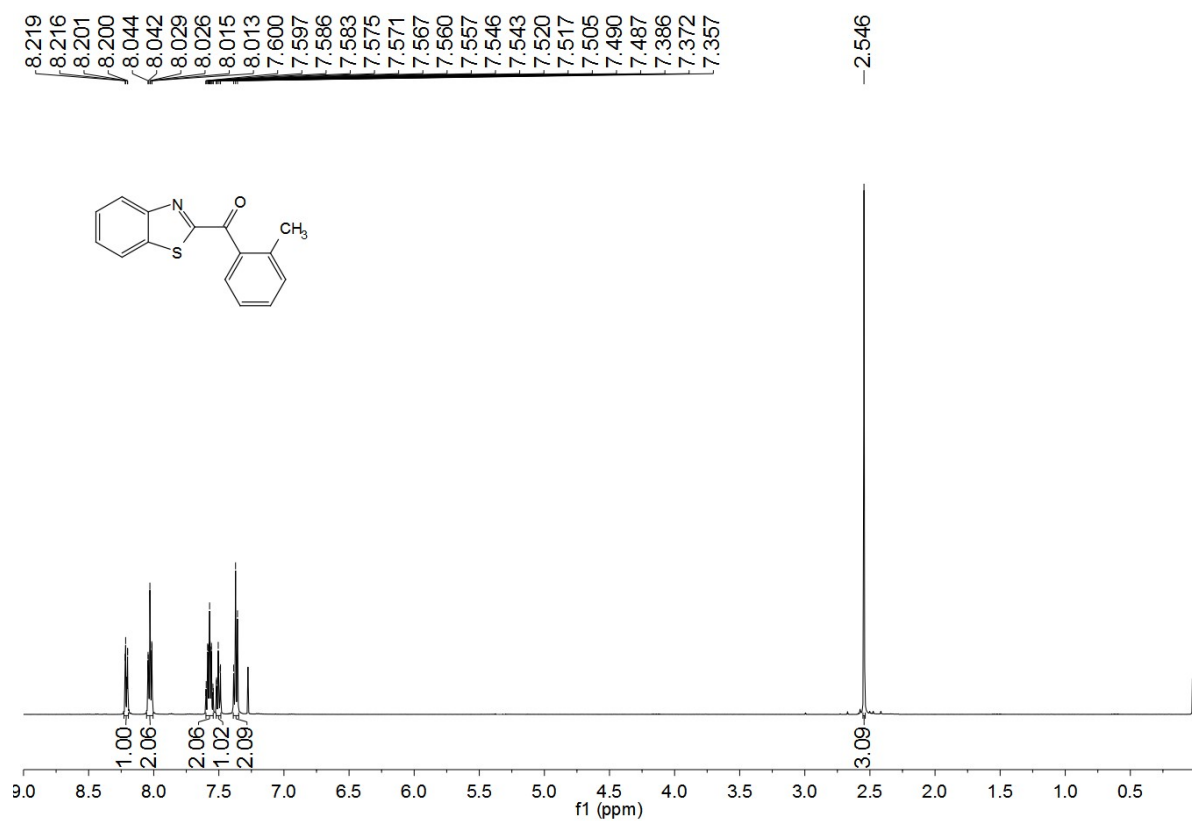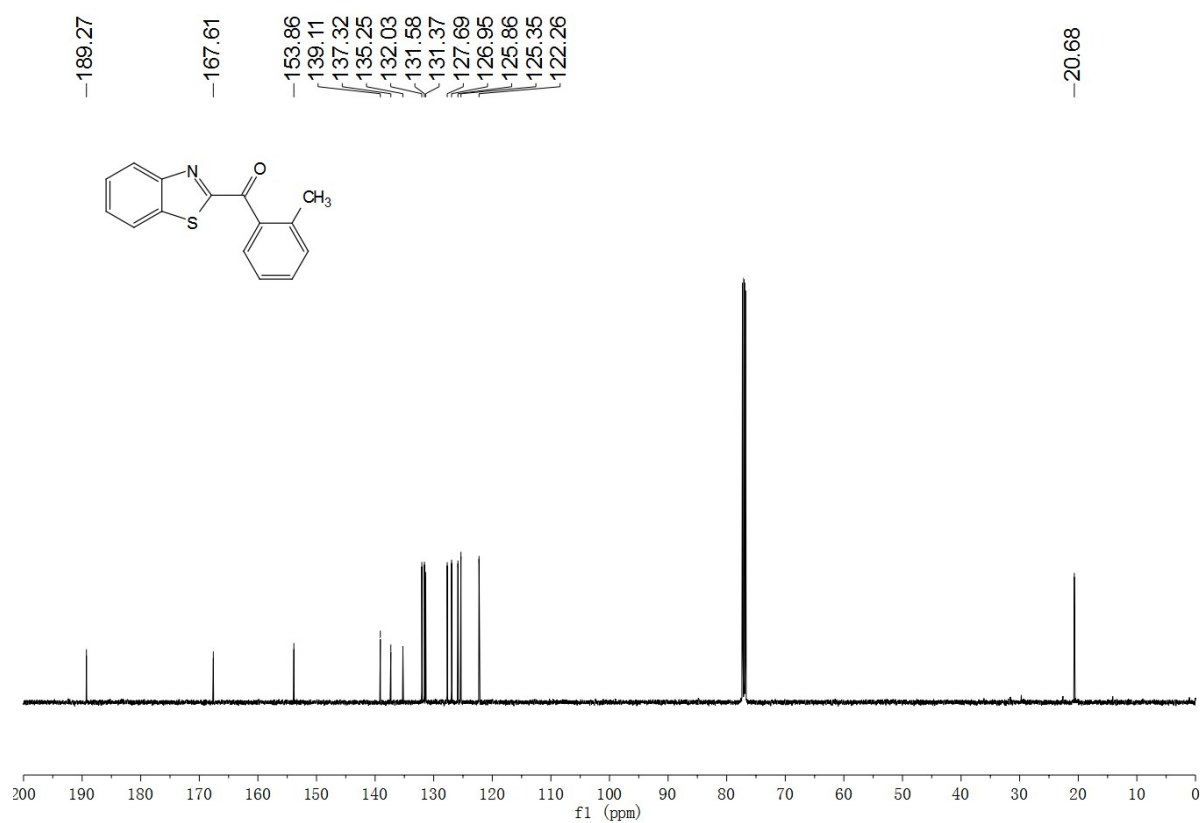

# <sup>1</sup>H and <sup>13</sup>C NMR Spectra of 3ac

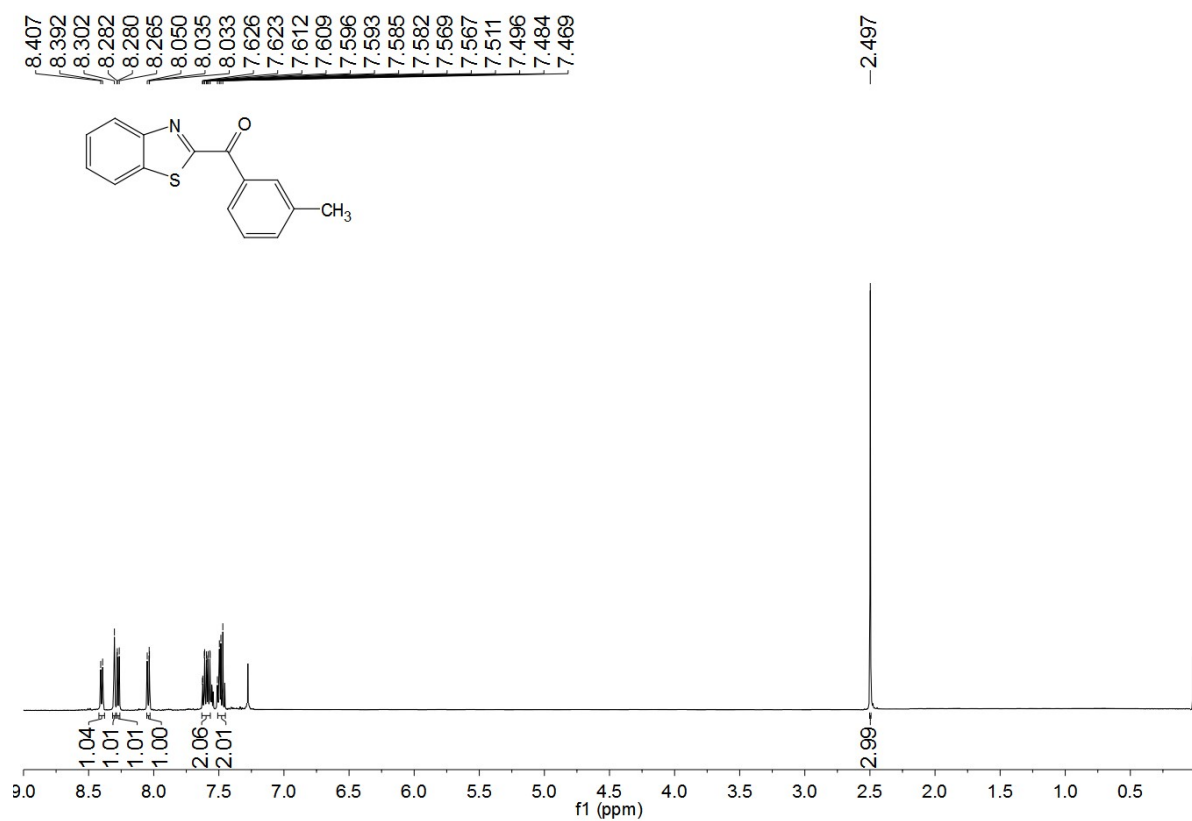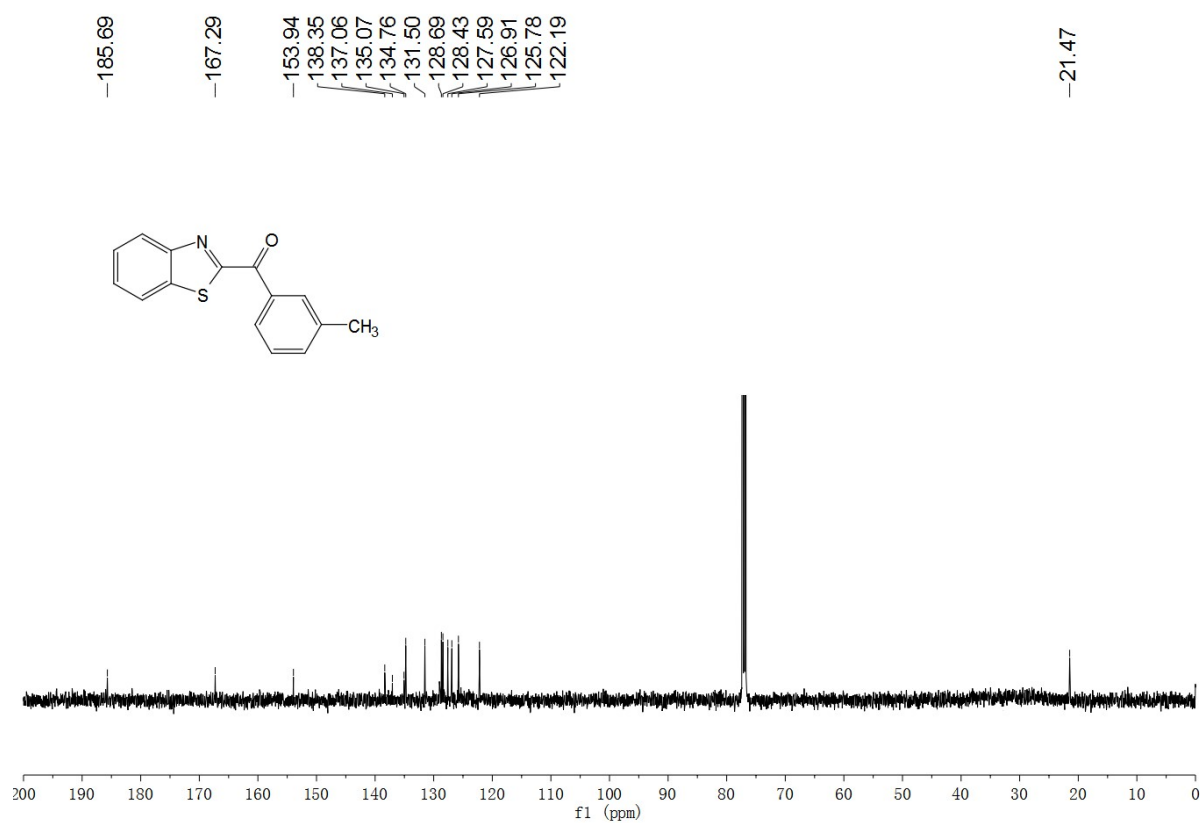

# <sup>1</sup>H and <sup>13</sup>C NMR Spectra of 3ad

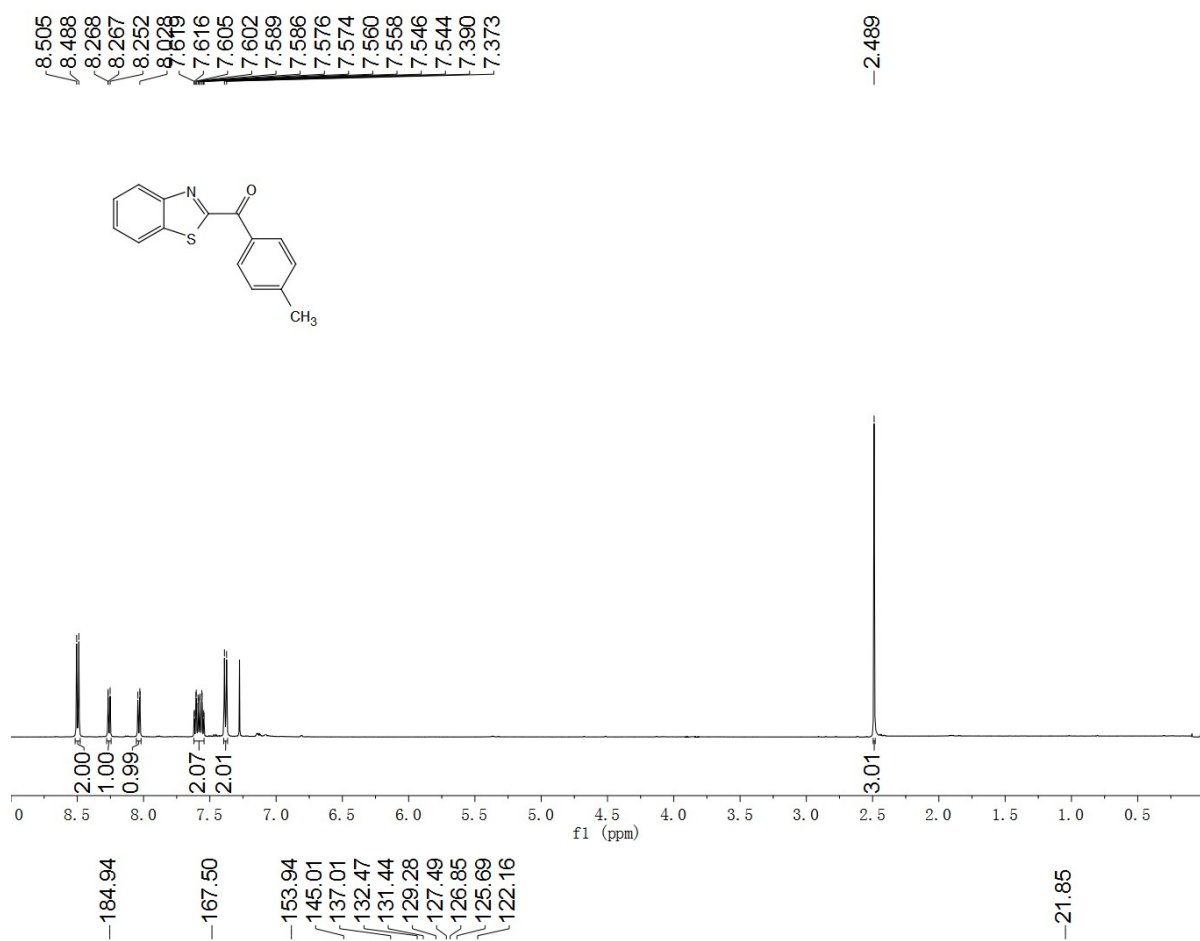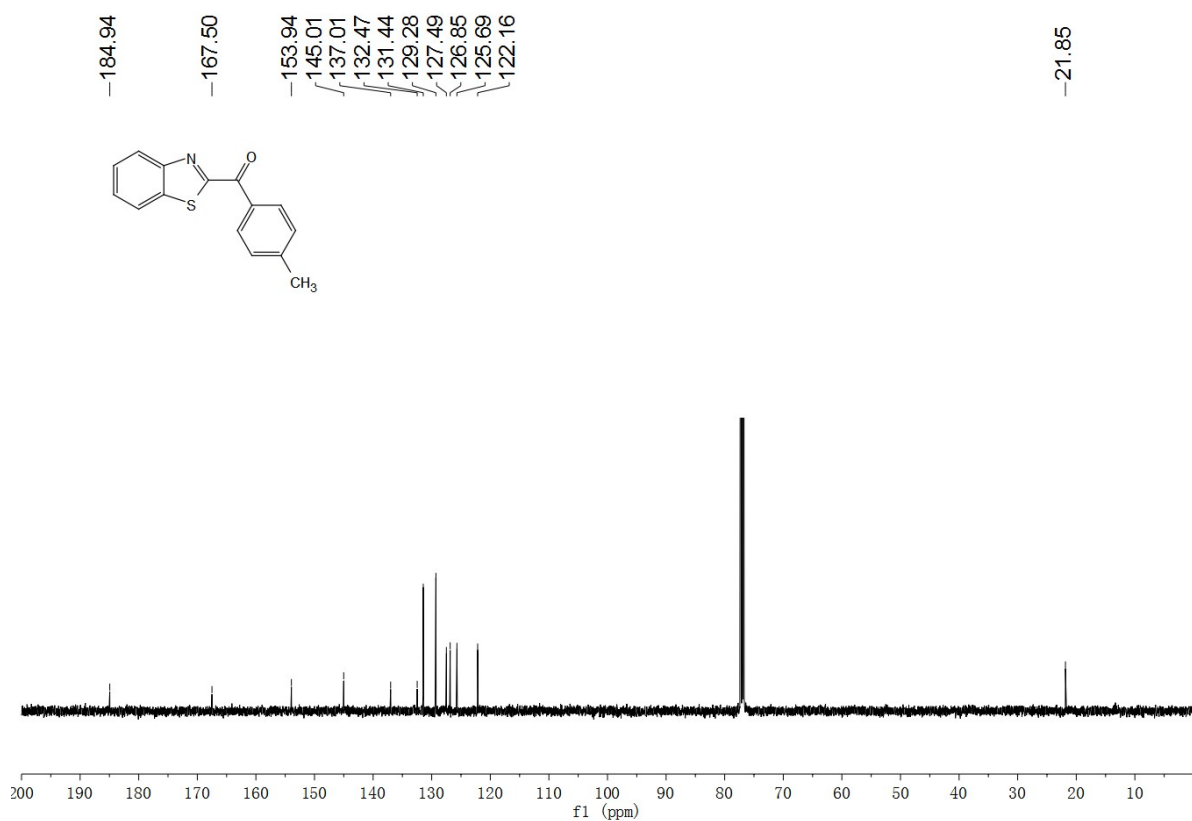

# <sup>1</sup>H and <sup>13</sup>C NMR Spectra of 3ae

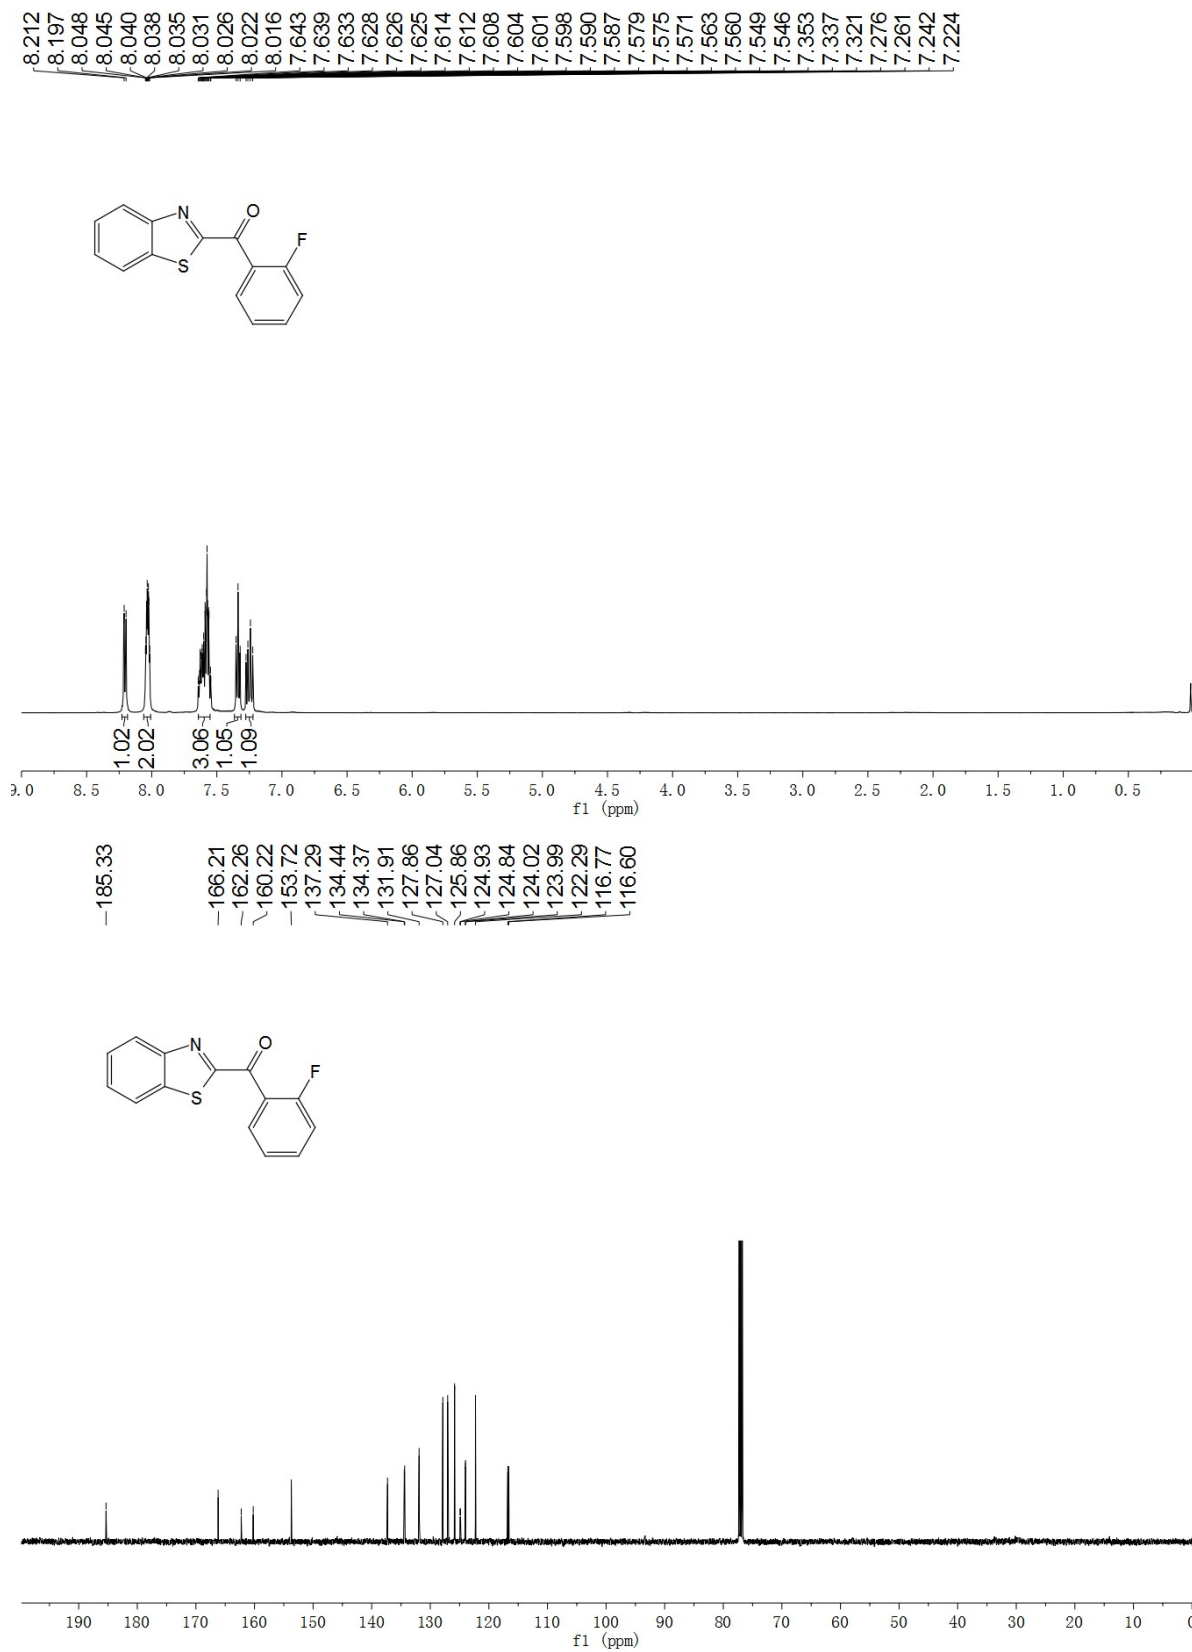

# <sup>1</sup>H and <sup>13</sup>C NMR Spectra of 3af

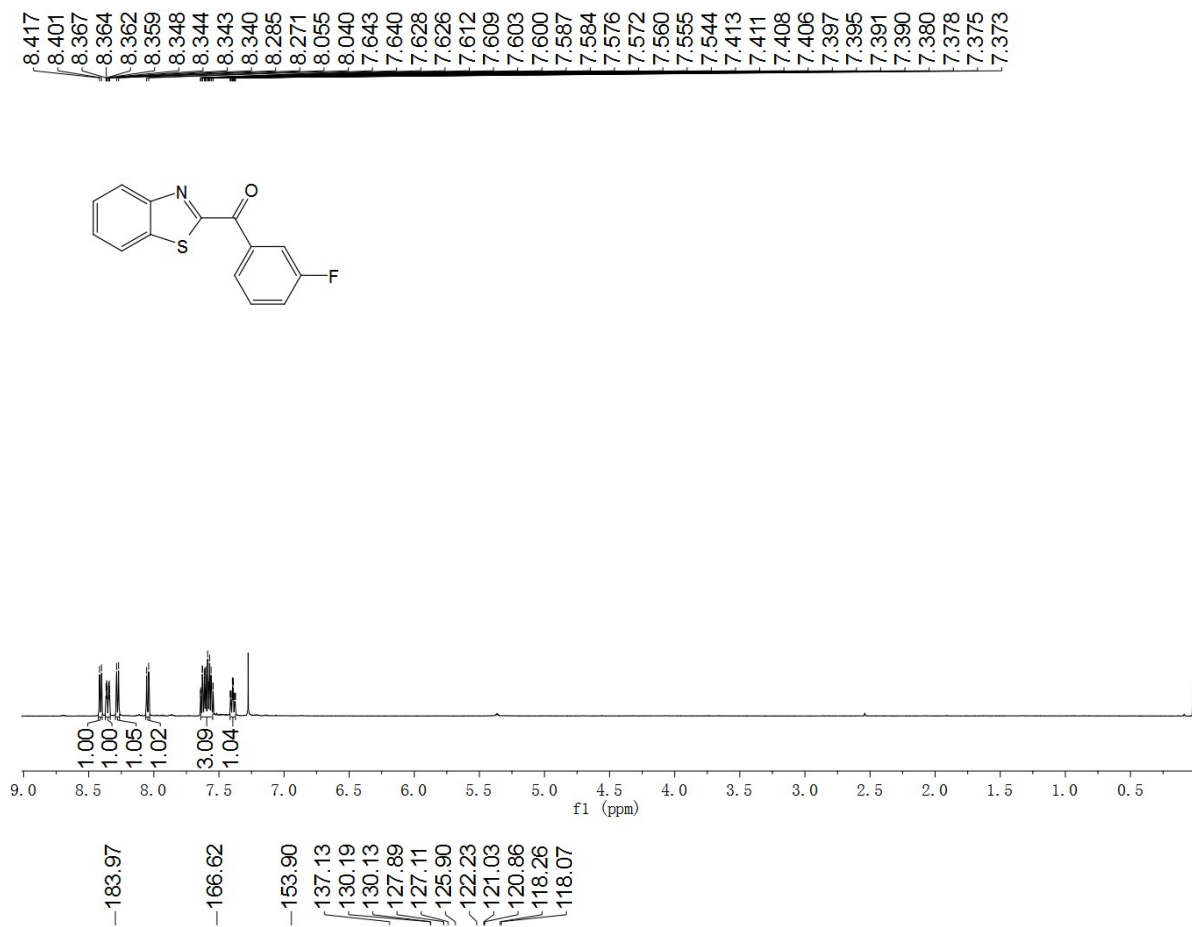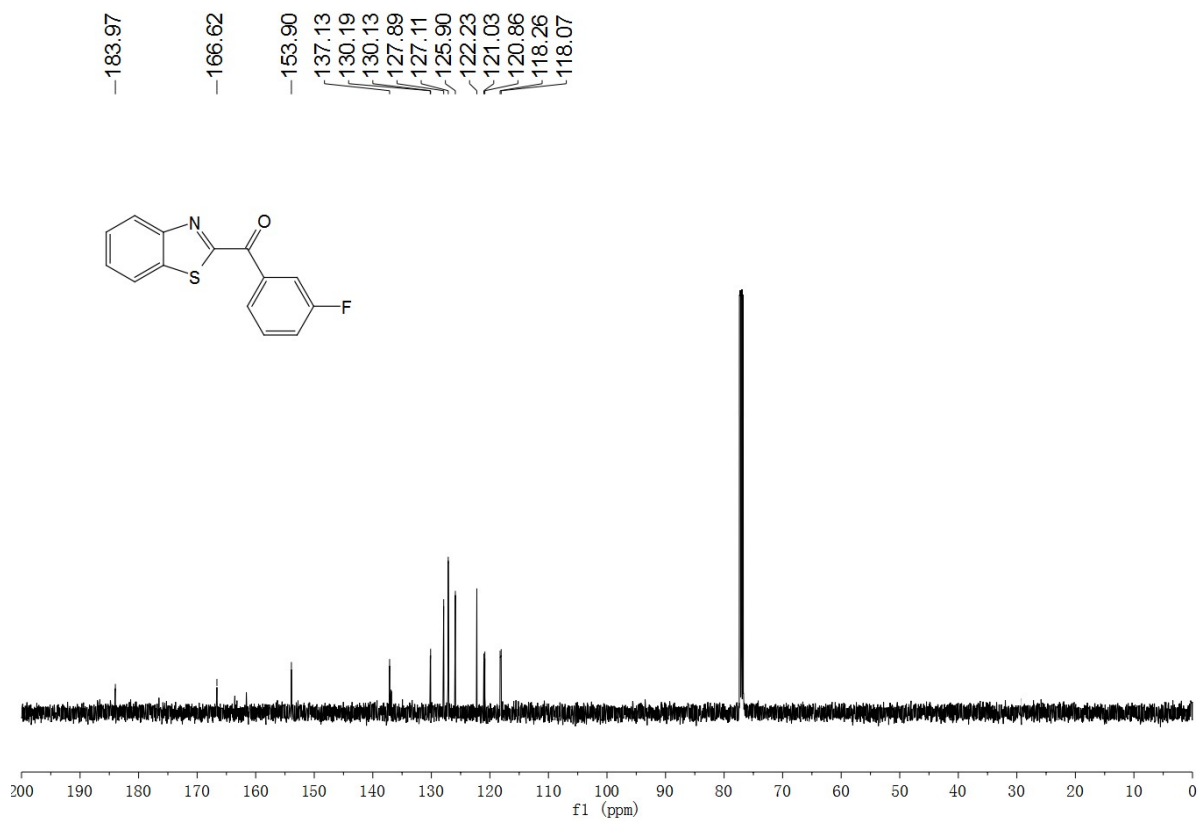

# <sup>1</sup>H and <sup>13</sup>C NMR Spectra of 3ag

8.712  
8.701  
8.695  
8.684  
8.269  
8.267  
8.252  
8.050  
8.049  
8.048  
8.035  
8.033  
7.634  
7.631  
7.619  
7.617  
7.603  
7.600  
7.592  
7.589  
7.576  
7.574  
7.562  
7.559  
7.276  
7.274  
7.256  
7.239

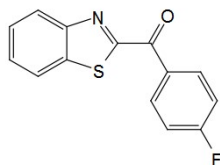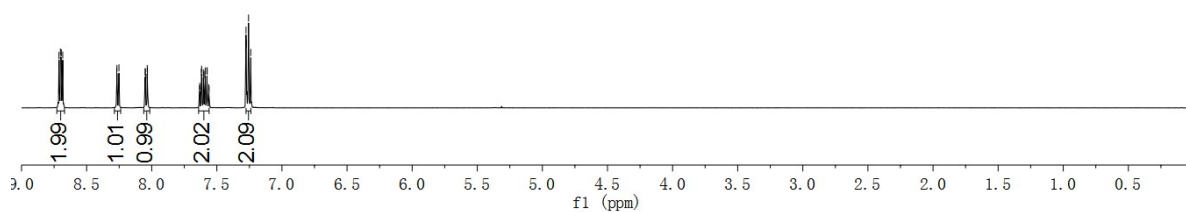

183.56  
167.45  
167.06  
165.40  
153.87  
137.03  
134.21  
134.14  
131.33  
131.31  
127.70  
126.99  
125.71  
122.18  
115.82  
115.64

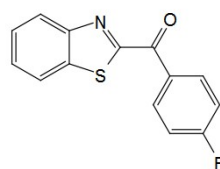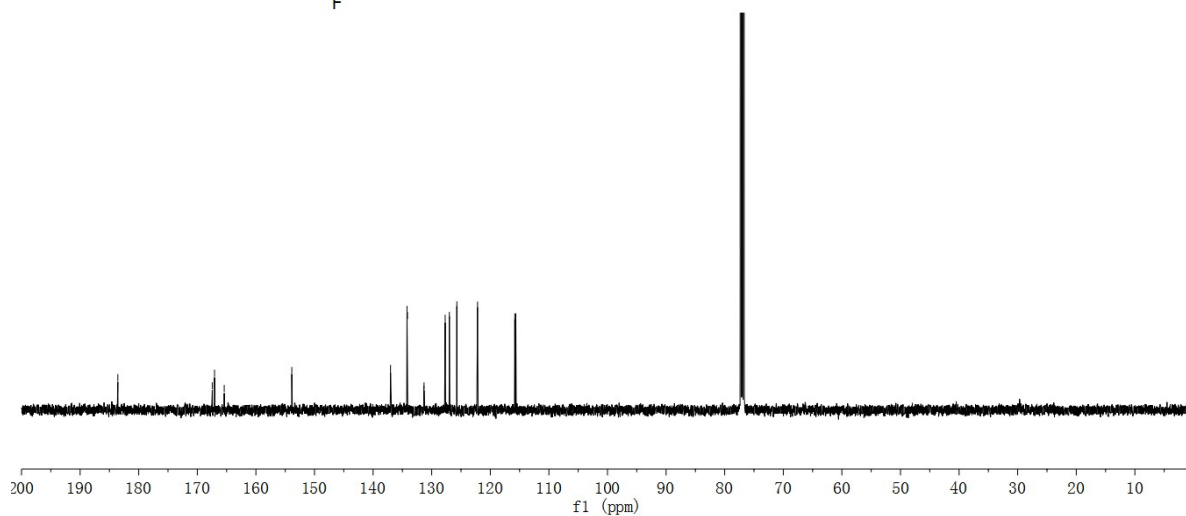



# <sup>1</sup>H and <sup>13</sup>C NMR Spectra of 3ah

8.196  
8.192  
8.189  
8.186  
8.181  
8.178  
8.048  
8.045  
8.040  
8.037  
8.035  
8.030  
7.792  
7.778  
7.775  
7.598  
7.588  
7.584  
7.577  
7.569  
7.566  
7.555  
7.550  
7.539  
7.538  
7.534  
7.527  
7.524  
7.511  
7.508  
7.466  
7.461  
7.454  
7.451  
7.449  
7.446  
7.438  
7.434

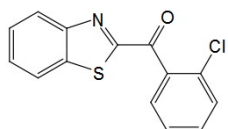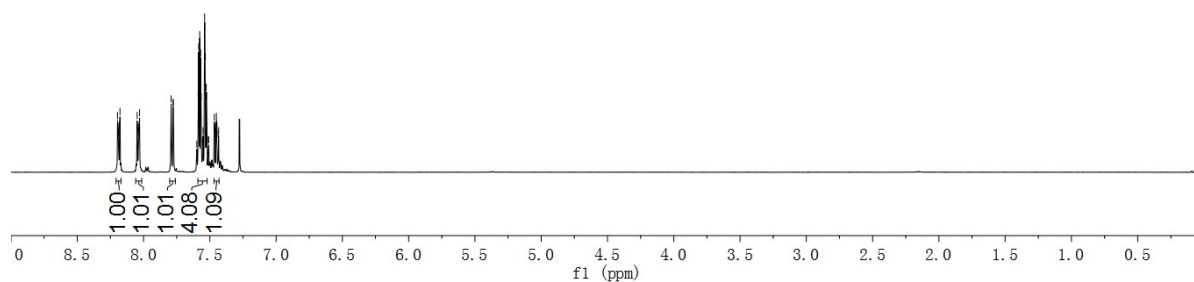

-187.61  
-165.95  
-153.76  
-137.45  
-136.07  
-132.63  
-132.36  
-130.79  
-130.55  
-127.97  
-127.07  
-126.49  
-125.97  
-122.33

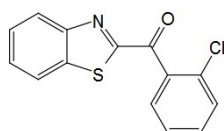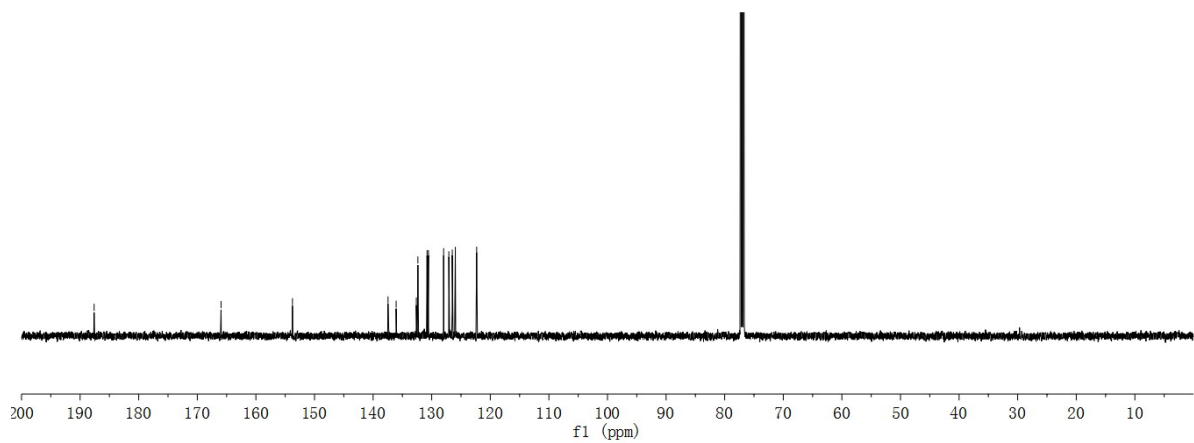

# <sup>1</sup>H and <sup>13</sup>C NMR Spectra of 3ai

8.585  
8.581  
8.578  
8.509  
8.493  
8.292  
8.277  
8.056  
8.041  
7.668  
7.666  
7.654  
7.652  
7.651  
7.644  
7.642  
7.630  
7.628  
7.614  
7.611  
7.605  
7.602  
7.588  
7.574  
7.572  
7.546  
7.530  
7.514

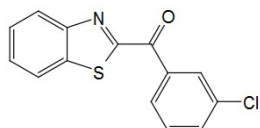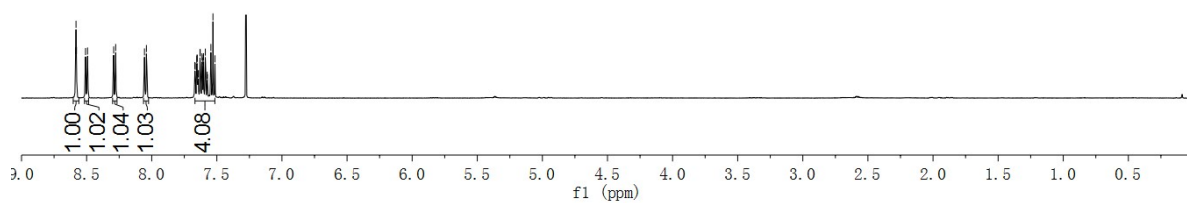

184.05  
166.48  
153.86  
137.11  
136.50  
134.73  
133.80  
131.19  
129.82  
129.45  
127.90  
127.11  
125.91  
122.22

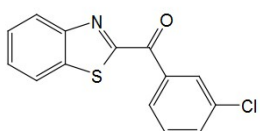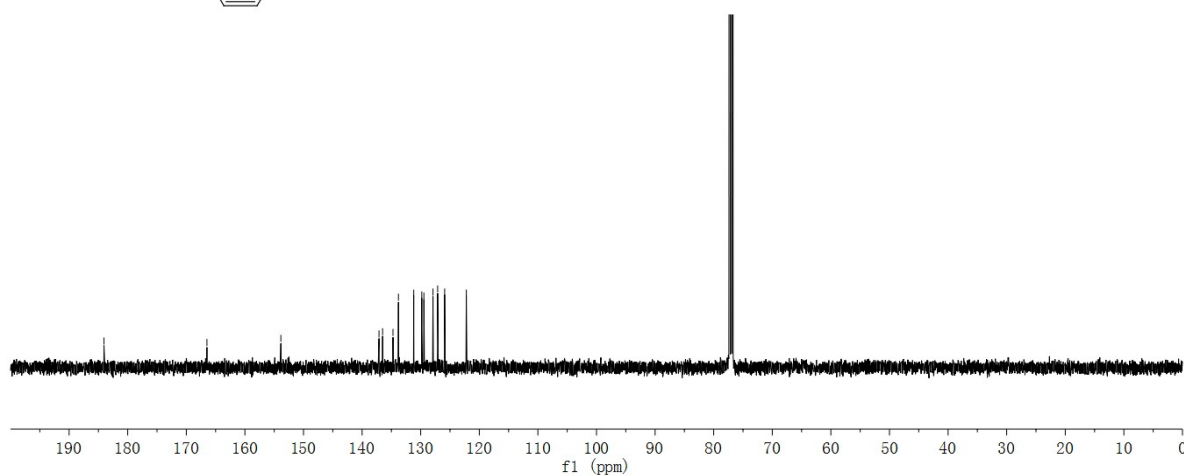

# <sup>1</sup>H and <sup>13</sup>C NMR Spectra of 3aj

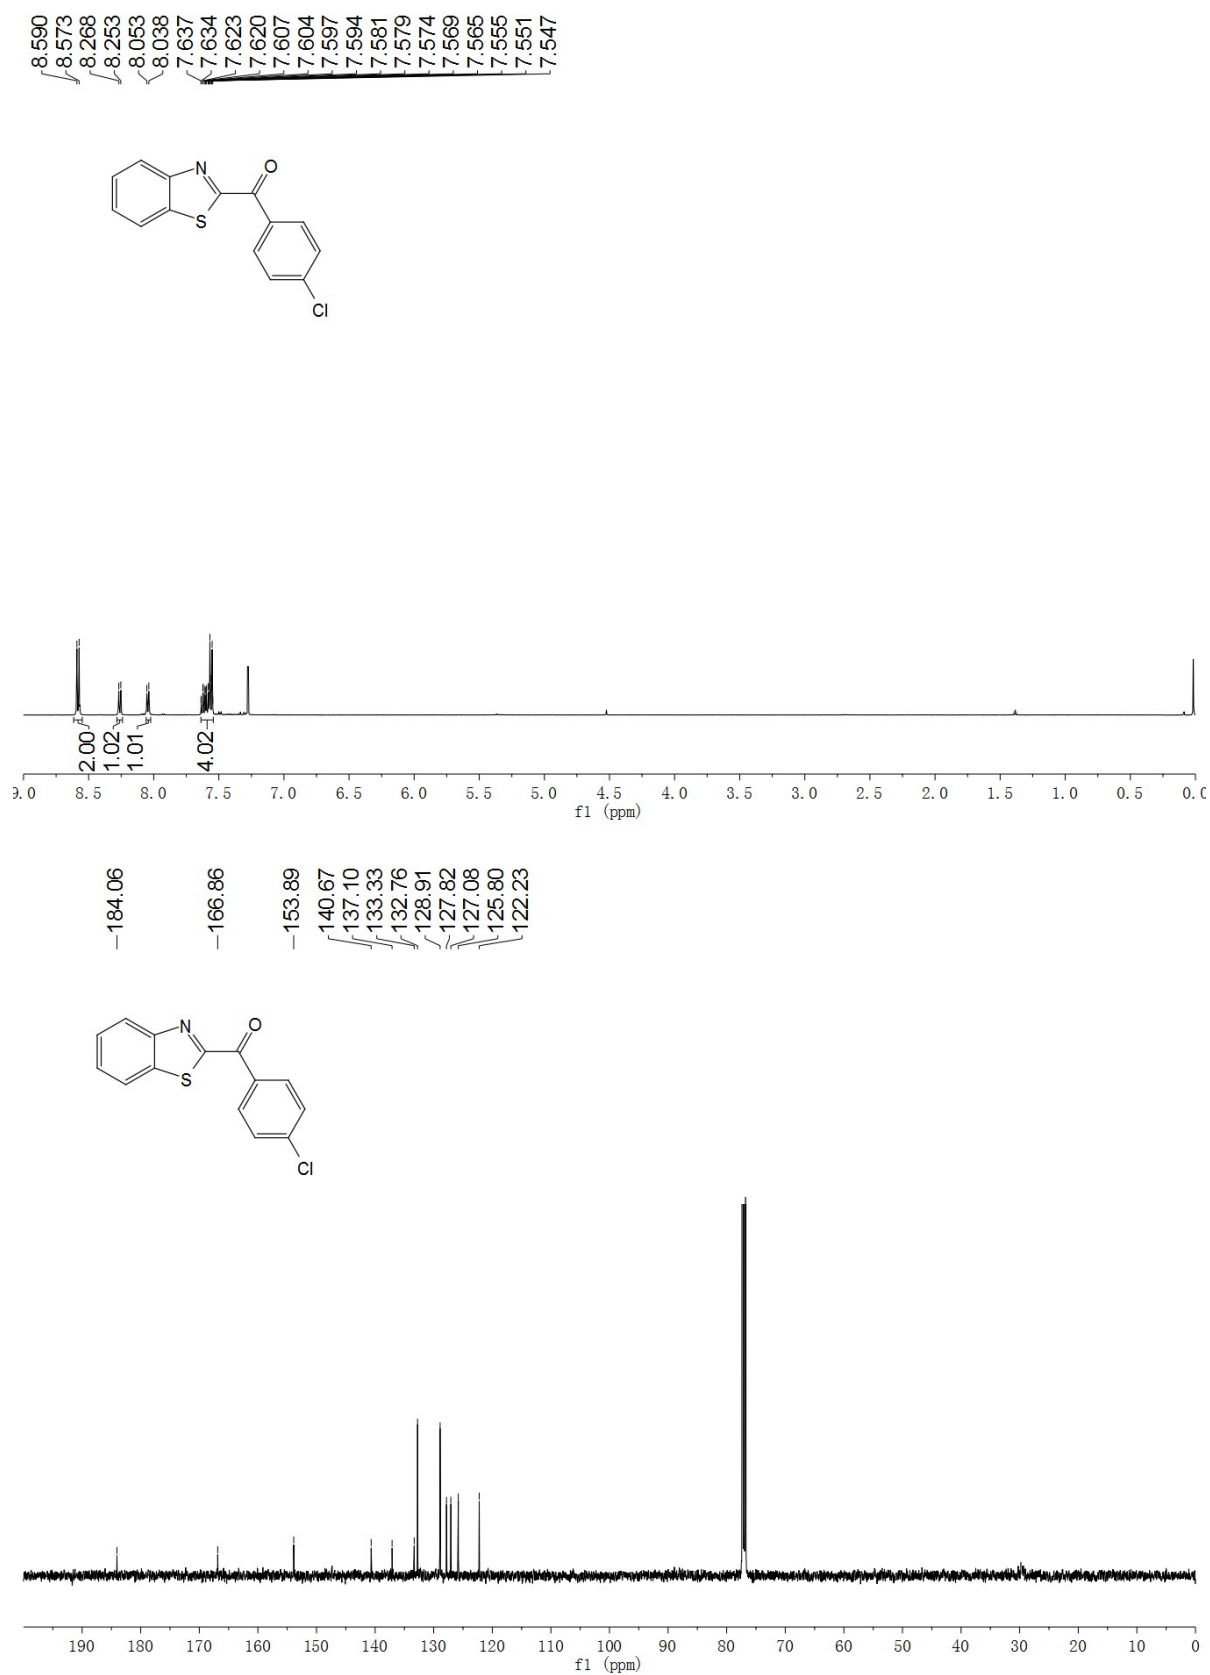

# <sup>1</sup>H and <sup>13</sup>C NMR Spectra of 3ak

8.195  
8.176  
8.047  
8.028  
7.748  
7.745  
7.733  
7.730  
7.718  
7.583  
7.575  
7.568  
7.513  
7.500  
7.498  
7.485  
7.483  
7.459  
7.455  
7.443  
7.440  
7.428  
7.424

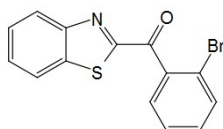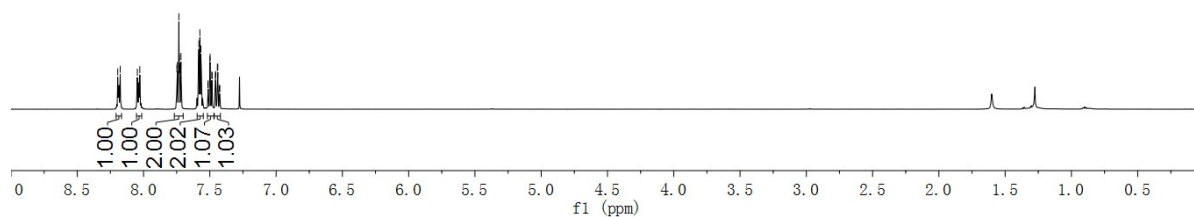

188.31  
165.67  
153.76  
138.09  
137.50  
133.70  
132.37  
130.71  
128.00  
127.09  
127.05  
125.99  
122.34  
120.64

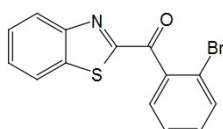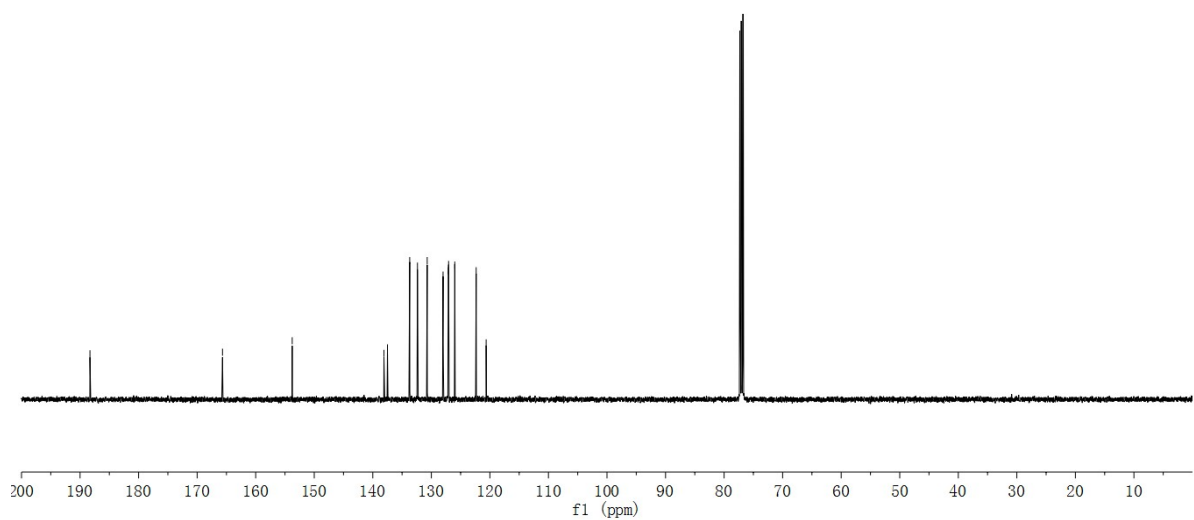

# <sup>1</sup>H and <sup>13</sup>C NMR Spectra of 3aI

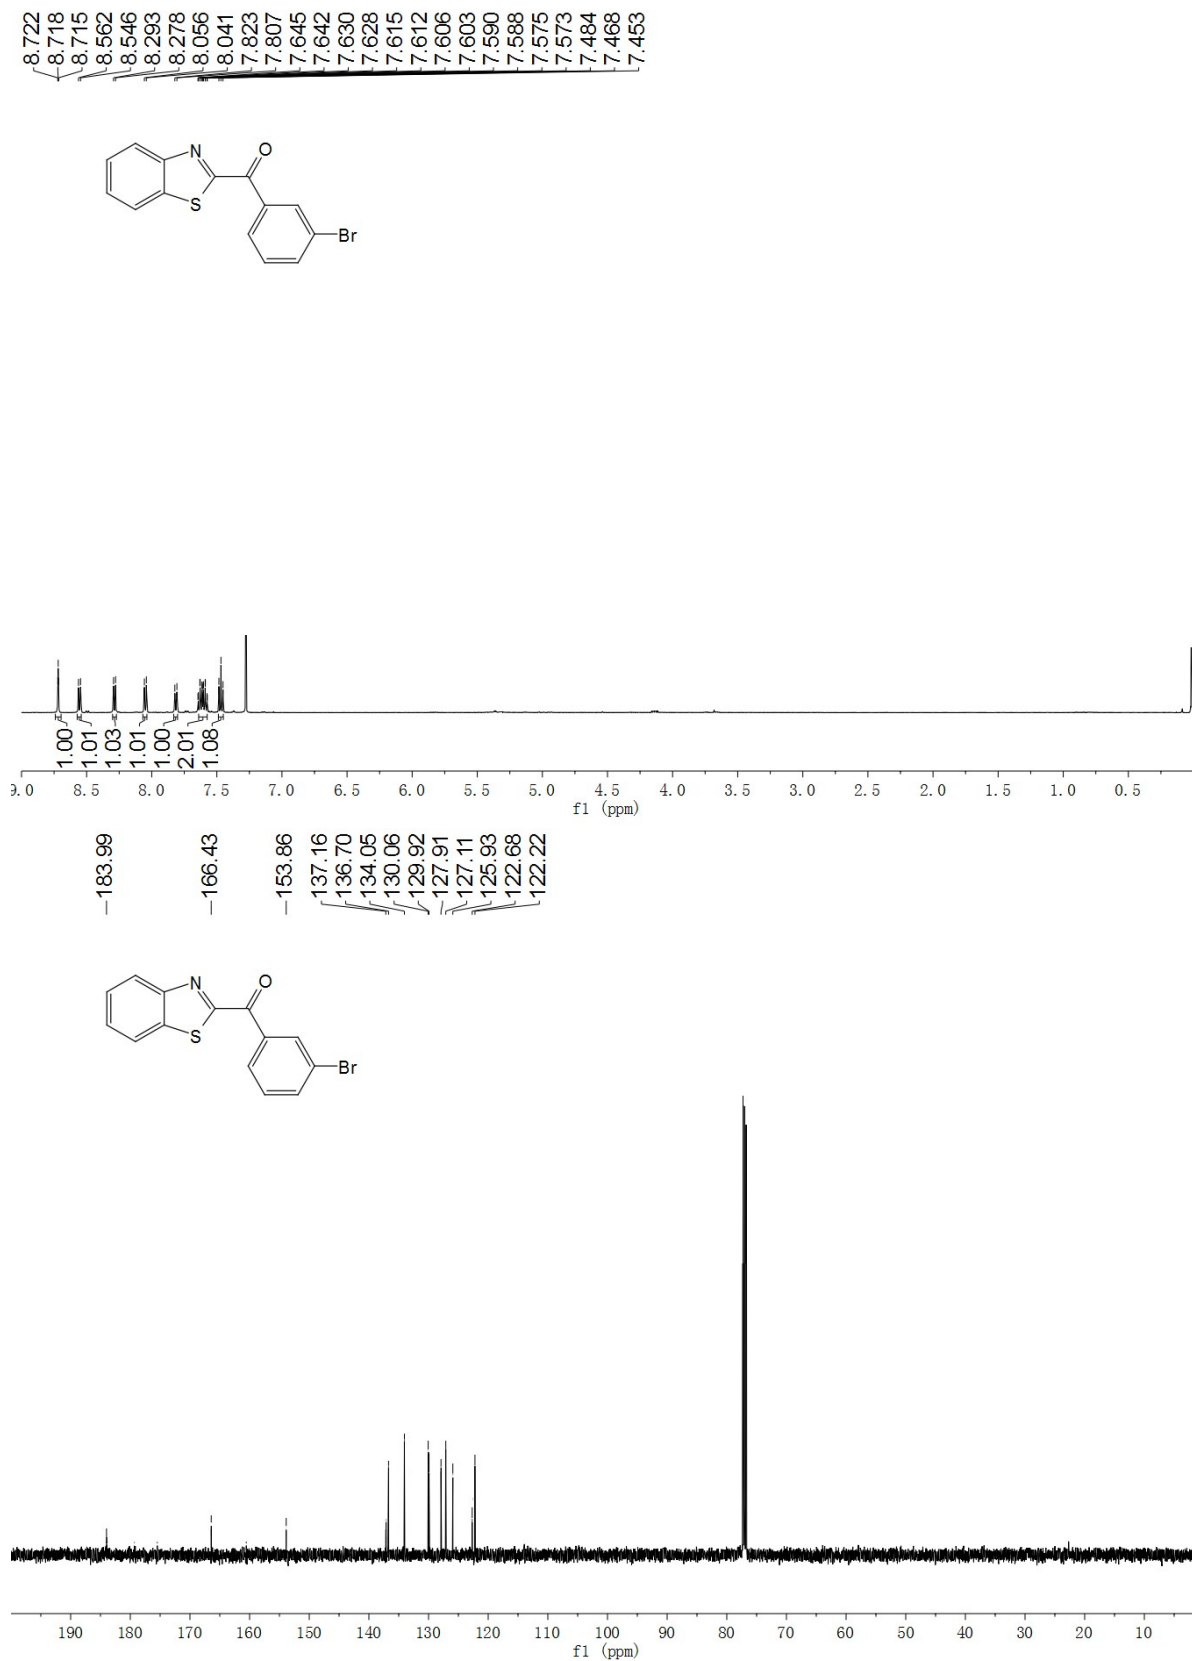

# <sup>1</sup>H and <sup>13</sup>C NMR Spectra of 3am

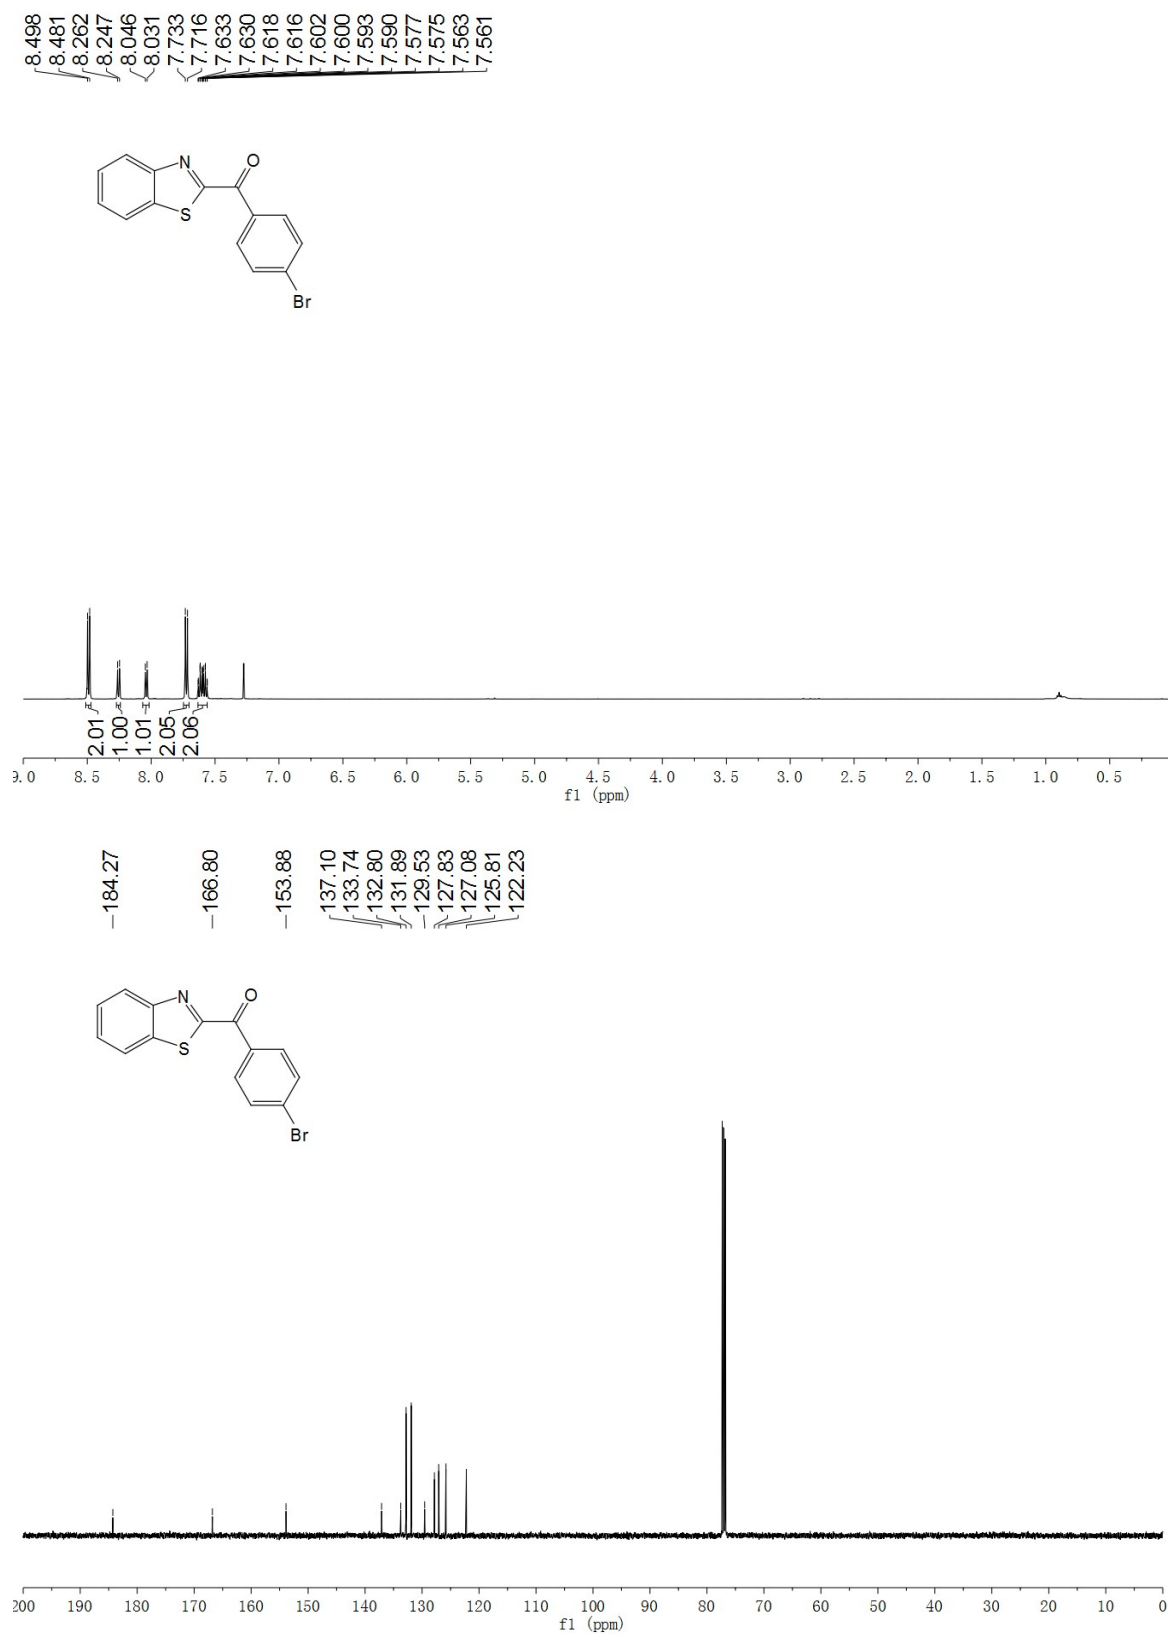

# <sup>1</sup>H and <sup>13</sup>C NMR Spectra of 3an

8.186  
8.170  
8.069  
8.067  
8.053  
8.051  
7.982  
7.967  
7.748  
7.744  
7.732  
7.729  
7.583  
7.580  
7.566  
7.552  
7.549  
7.509  
7.506  
7.492  
7.476  
7.462  
7.460  
7.210  
7.207  
7.194  
7.191  
7.179  
7.176

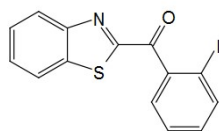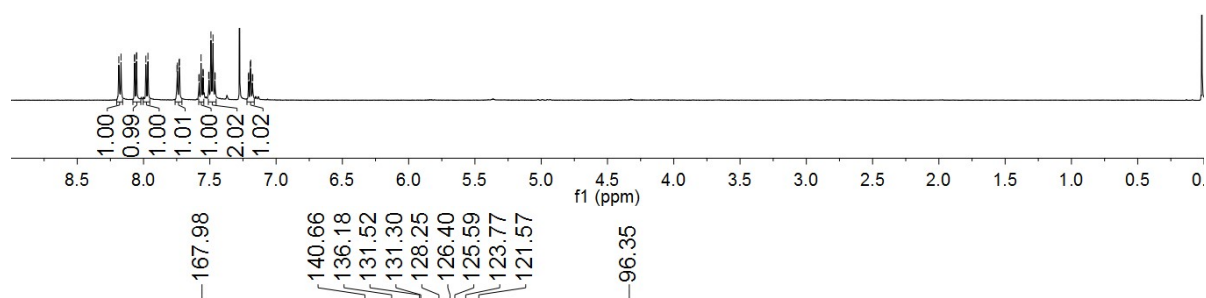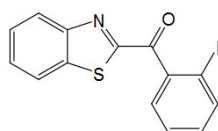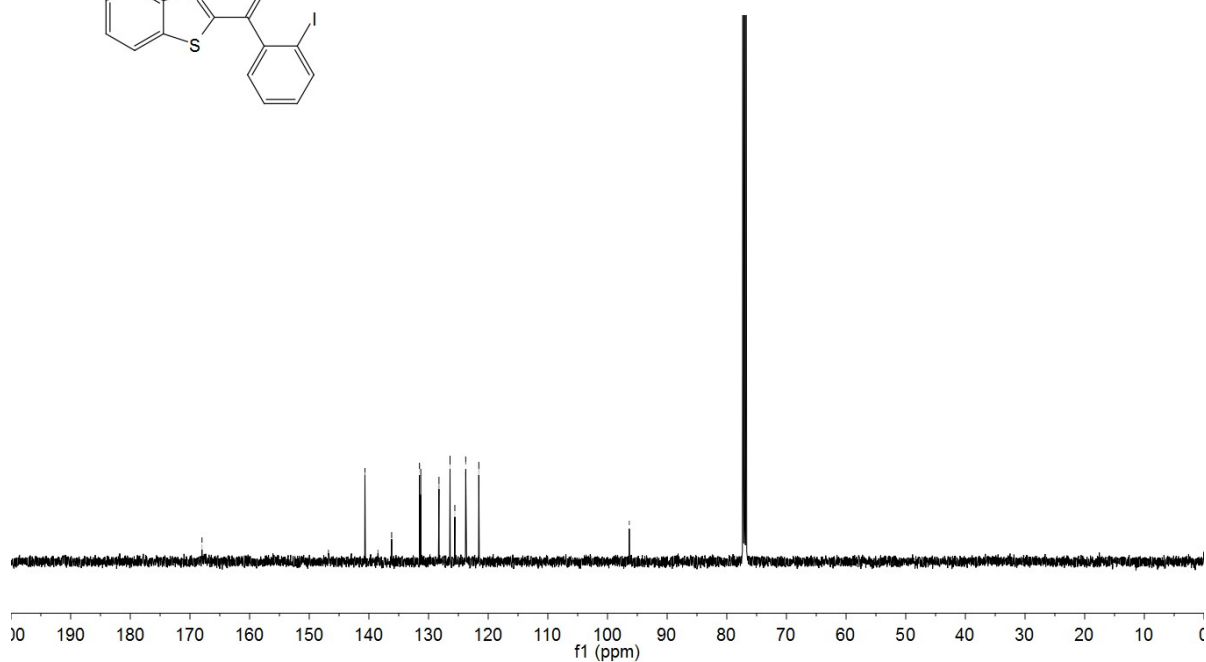

# <sup>1</sup>H and <sup>13</sup>C NMR Spectra of 3ao

8.873  
8.870  
8.867  
8.600  
8.598  
8.595  
8.585  
8.582  
8.579  
8.283  
8.281  
8.268  
8.266  
8.265  
8.264  
8.042  
8.040  
8.028  
8.026  
8.014  
8.012  
8.011  
8.009  
7.999  
7.996  
7.995  
7.993  
7.634  
7.631  
7.620  
7.617  
7.604  
7.601  
7.594  
7.591  
7.578  
7.576  
7.564  
7.561  
7.336  
7.320  
7.304

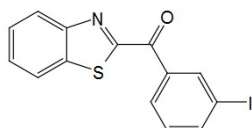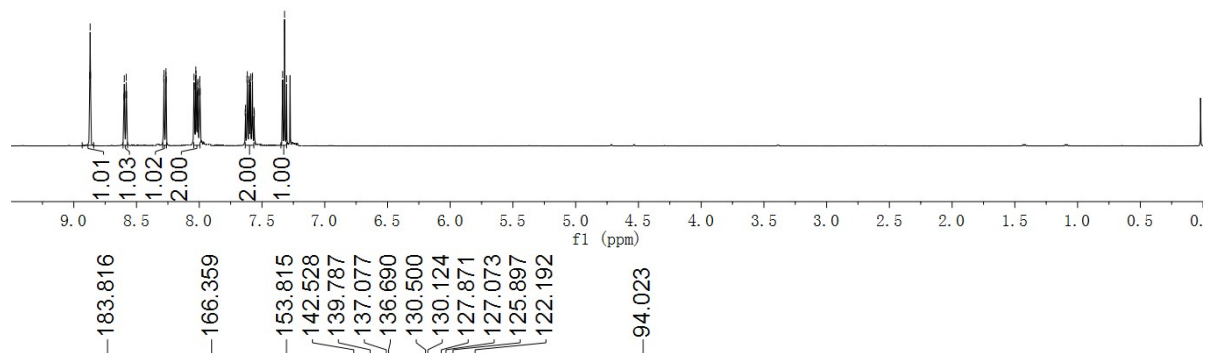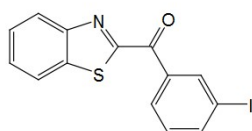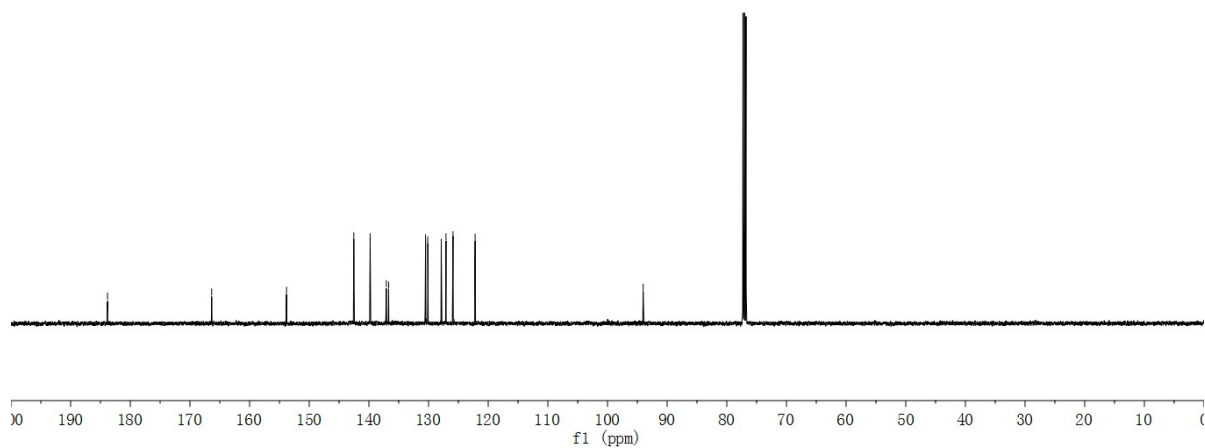



# <sup>1</sup>H and <sup>13</sup>C NMR Spectra of 3ap

8.327  
8.323  
8.320  
8.310  
8.306  
8.302  
8.259  
8.257  
8.245  
8.243  
8.242  
8.044  
8.042  
8.041  
8.028  
8.026  
7.961  
7.957  
7.953  
7.943  
7.939  
7.935  
7.630  
7.627  
7.615  
7.613  
7.600  
7.597  
7.591  
7.588  
7.575  
7.572

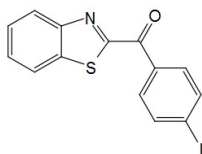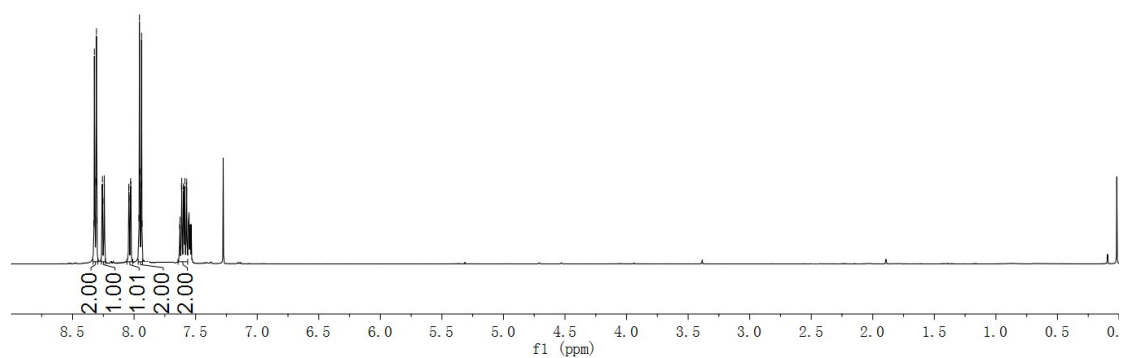

-184.58  
-166.73  
-153.83  
-137.87  
-137.07  
-134.23  
-132.56  
-127.80  
-127.05  
-125.78  
-122.20  
-102.57

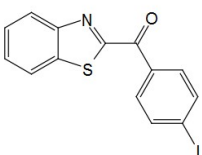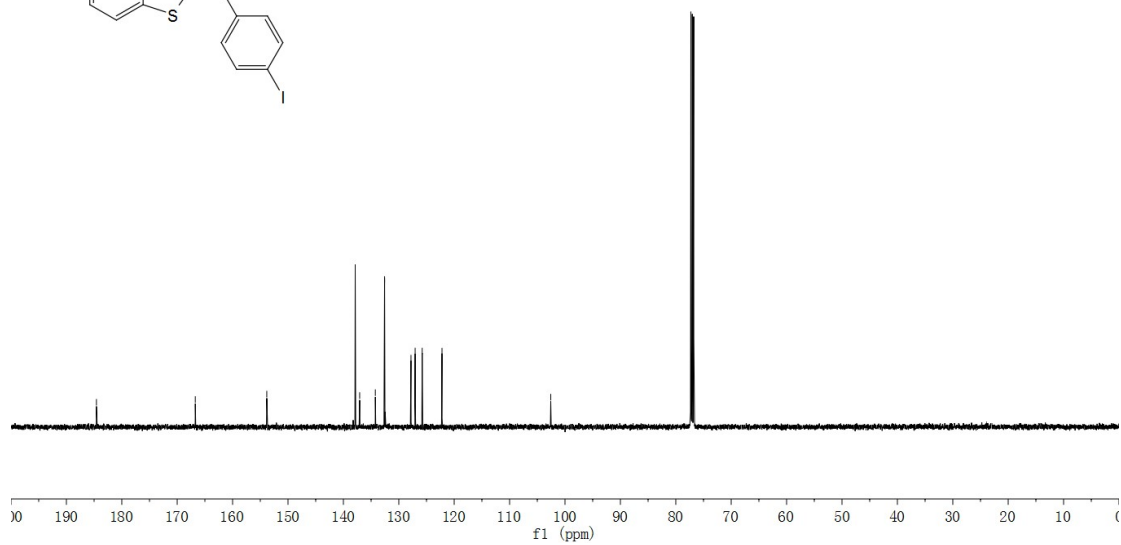

# <sup>1</sup>H and <sup>13</sup>C NMR Spectra of 3aq

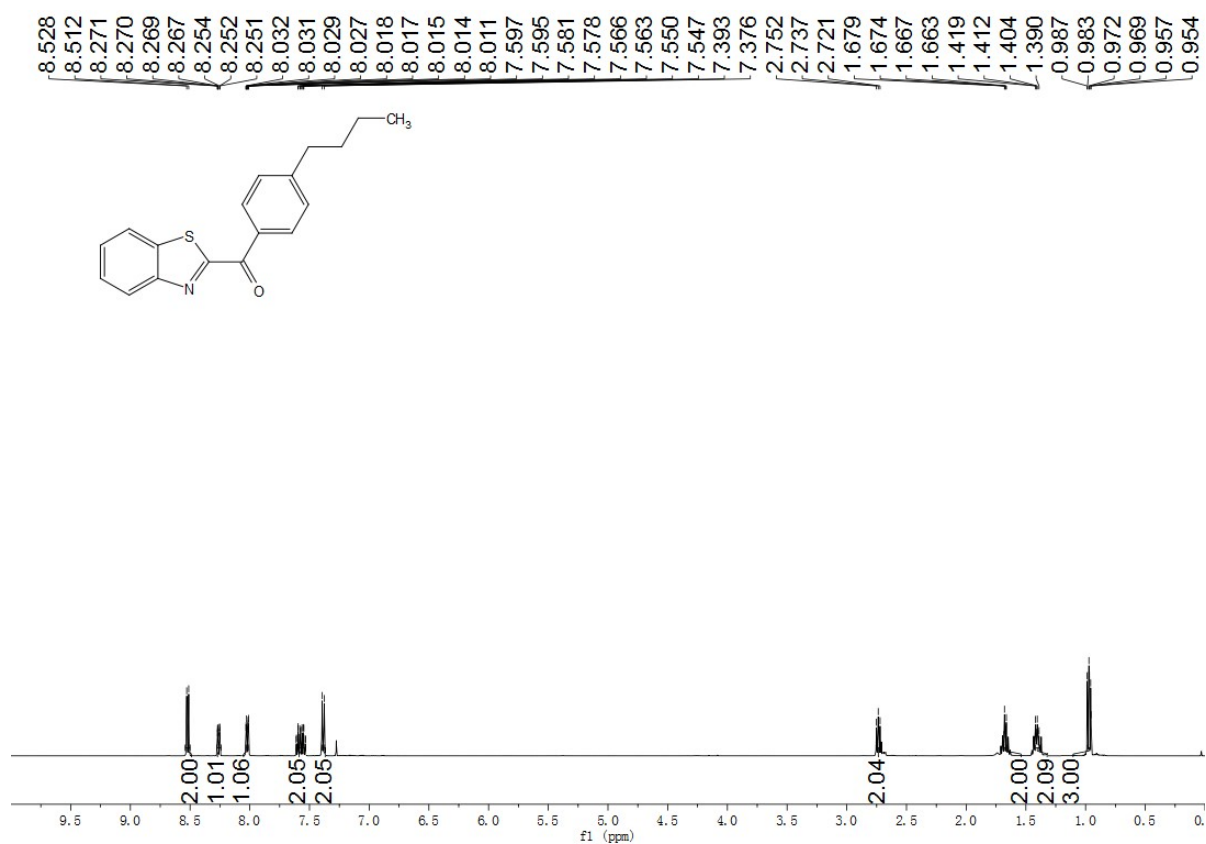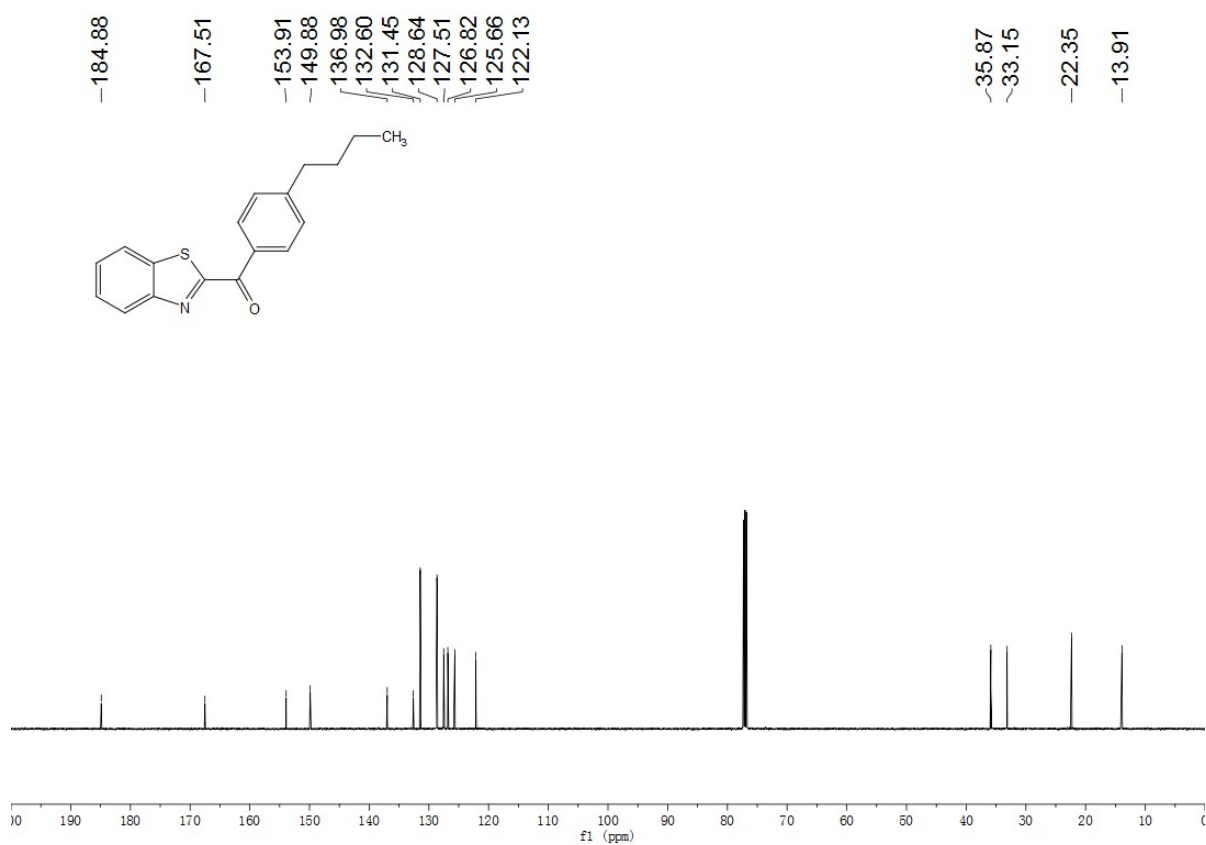

# <sup>1</sup>H and <sup>13</sup>C NMR Spectra of 3ar

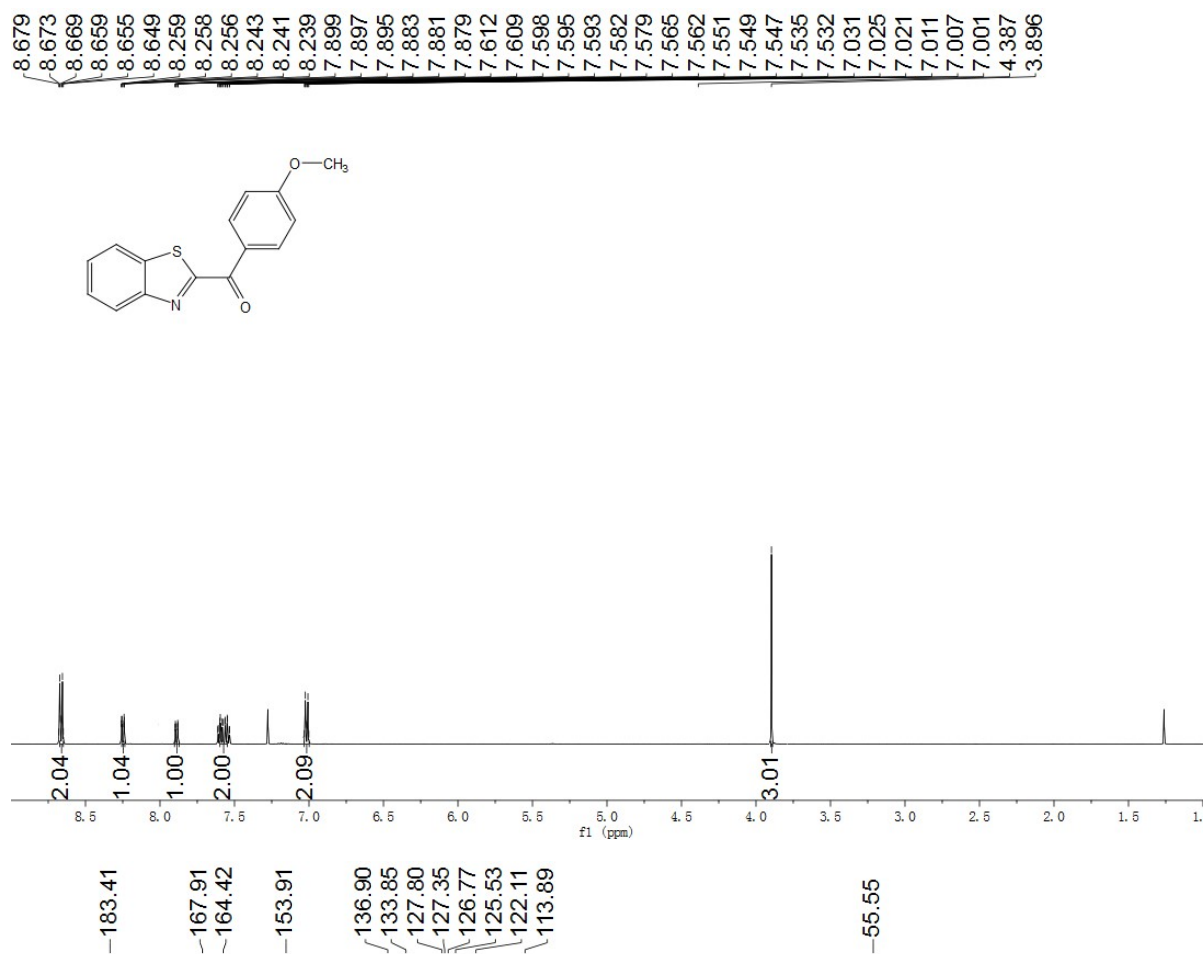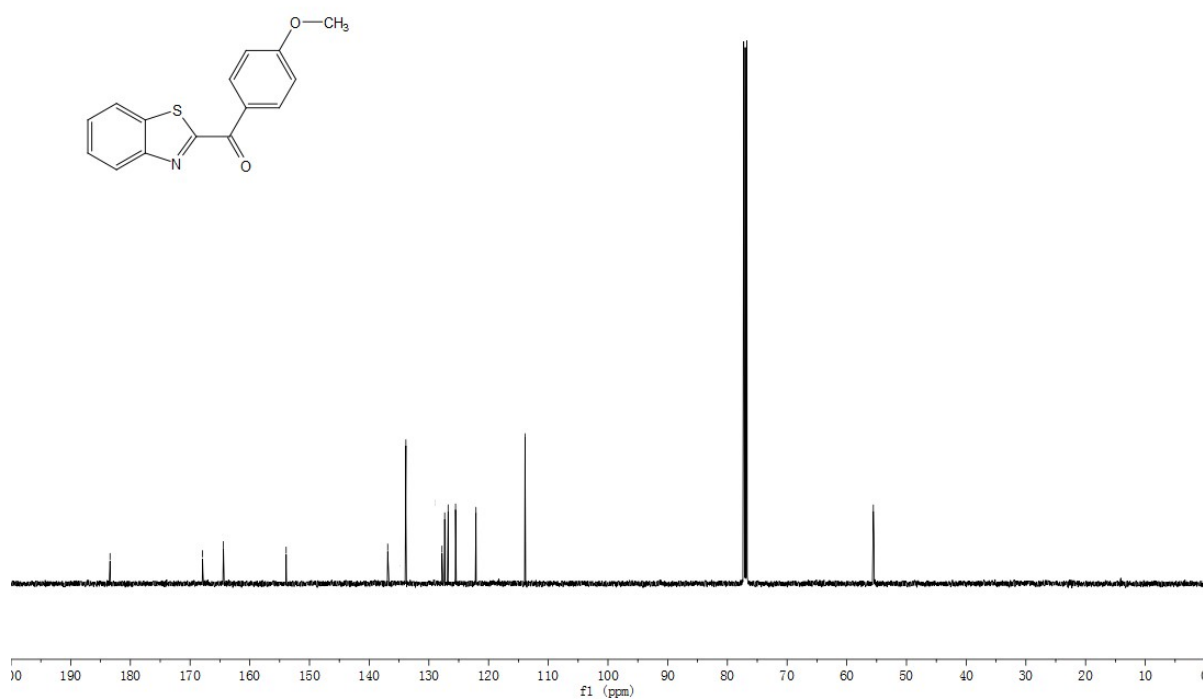

# <sup>1</sup>H and <sup>13</sup>C NMR Spectra of 3as

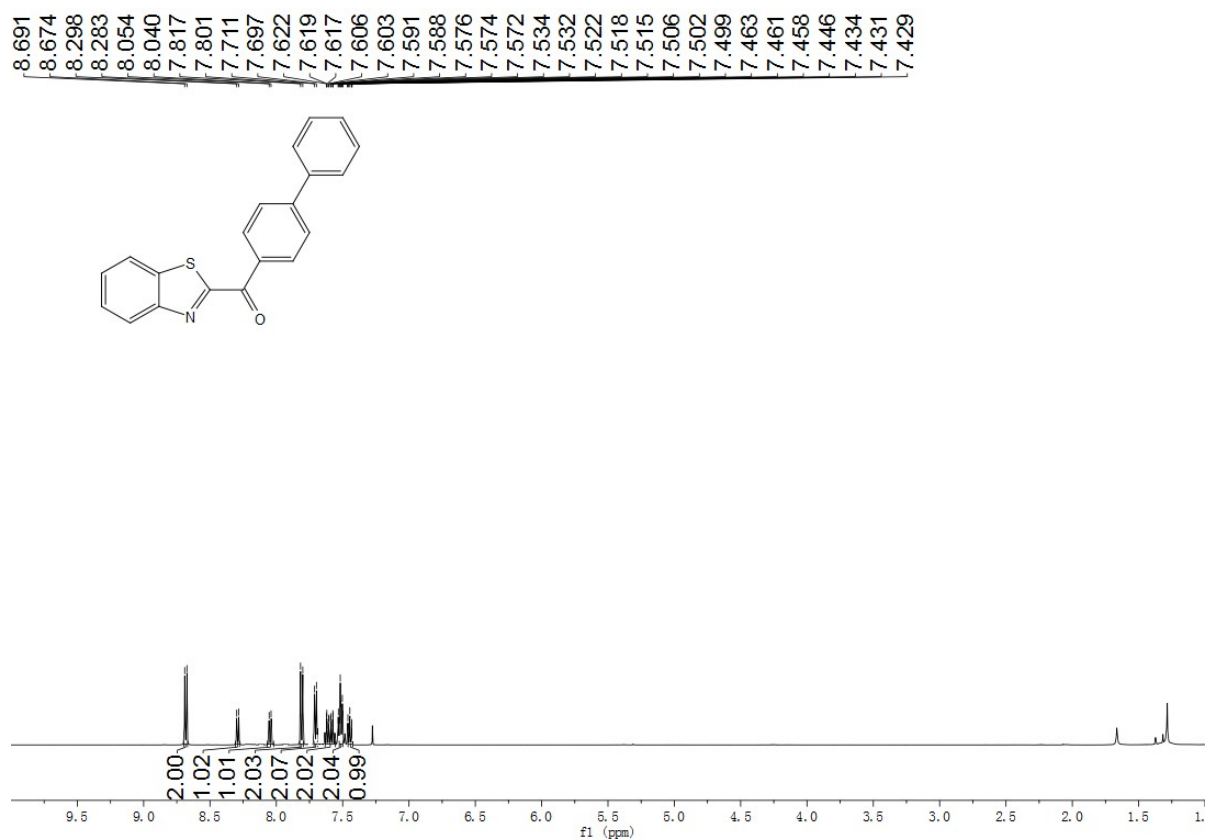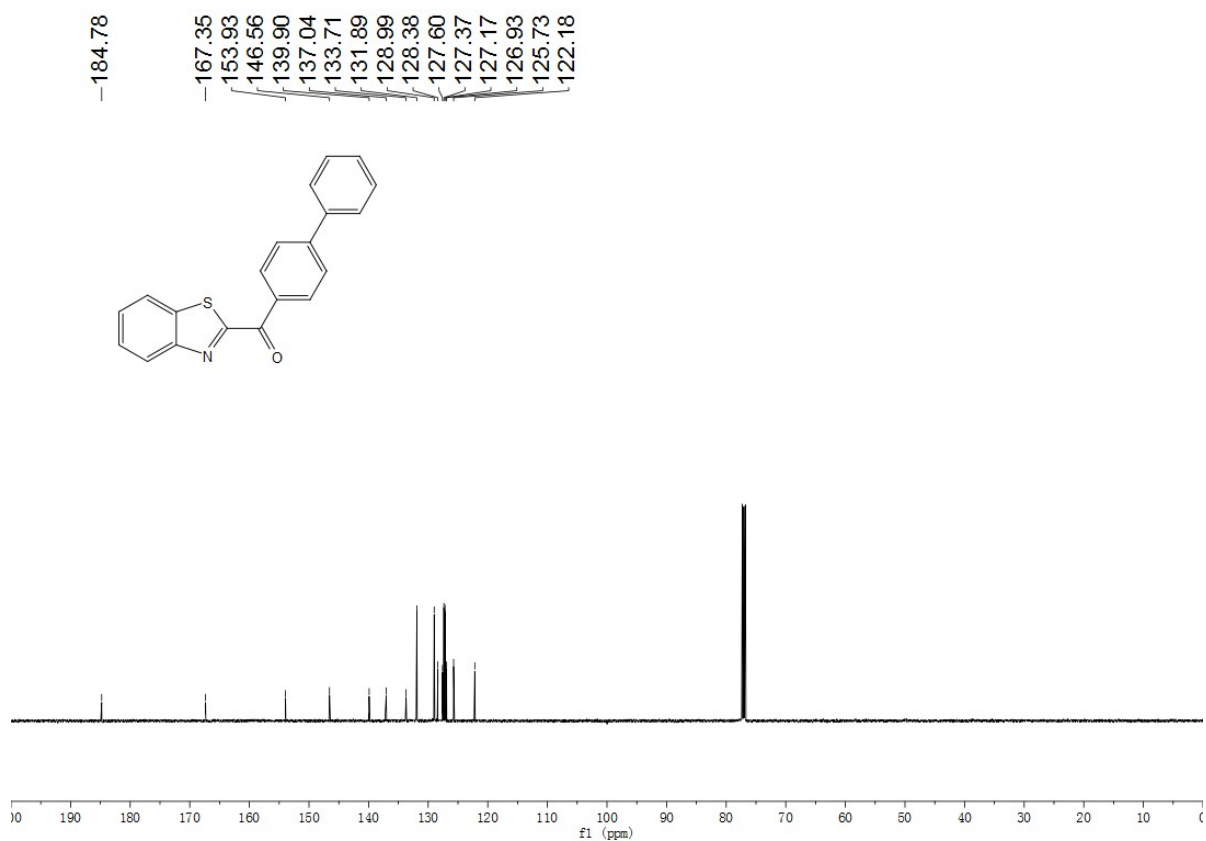

# <sup>1</sup>H and <sup>13</sup>C NMR Spectra of 3at

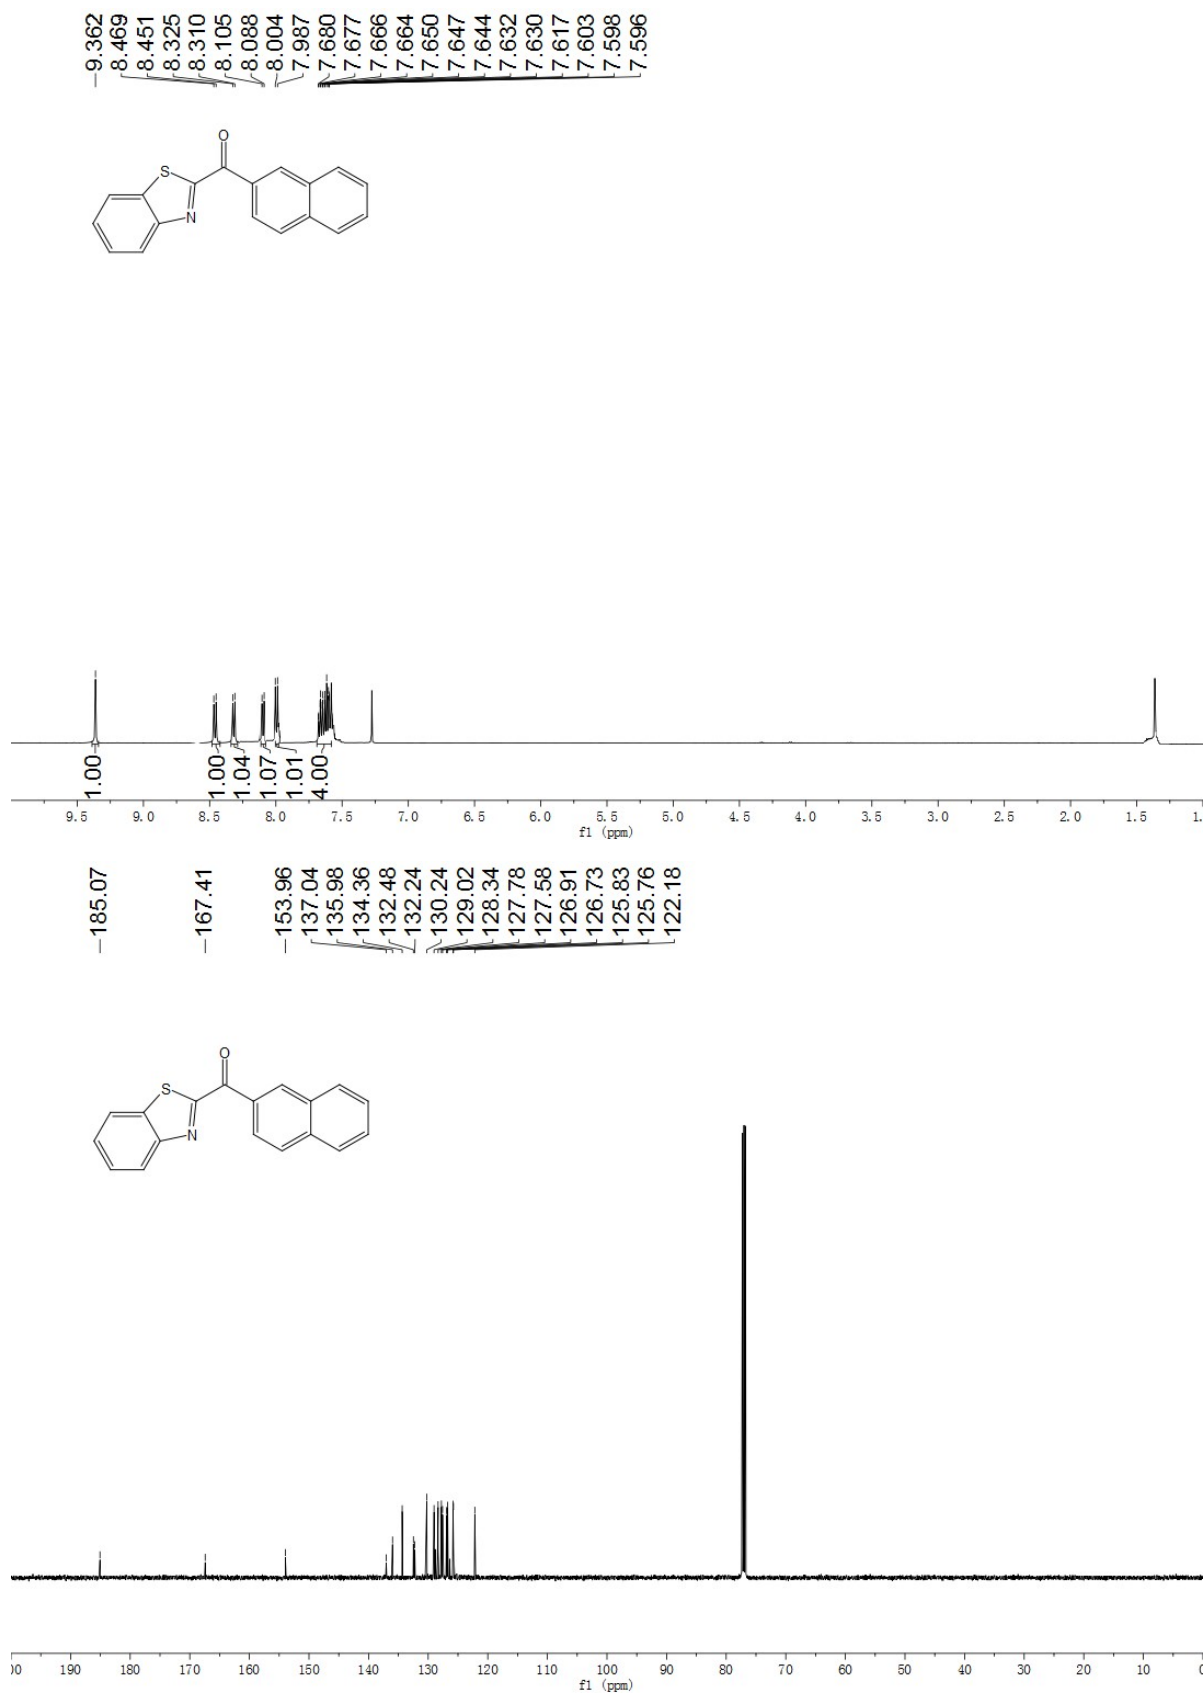

# <sup>1</sup>H and <sup>13</sup>C NMR Spectra of 3ba

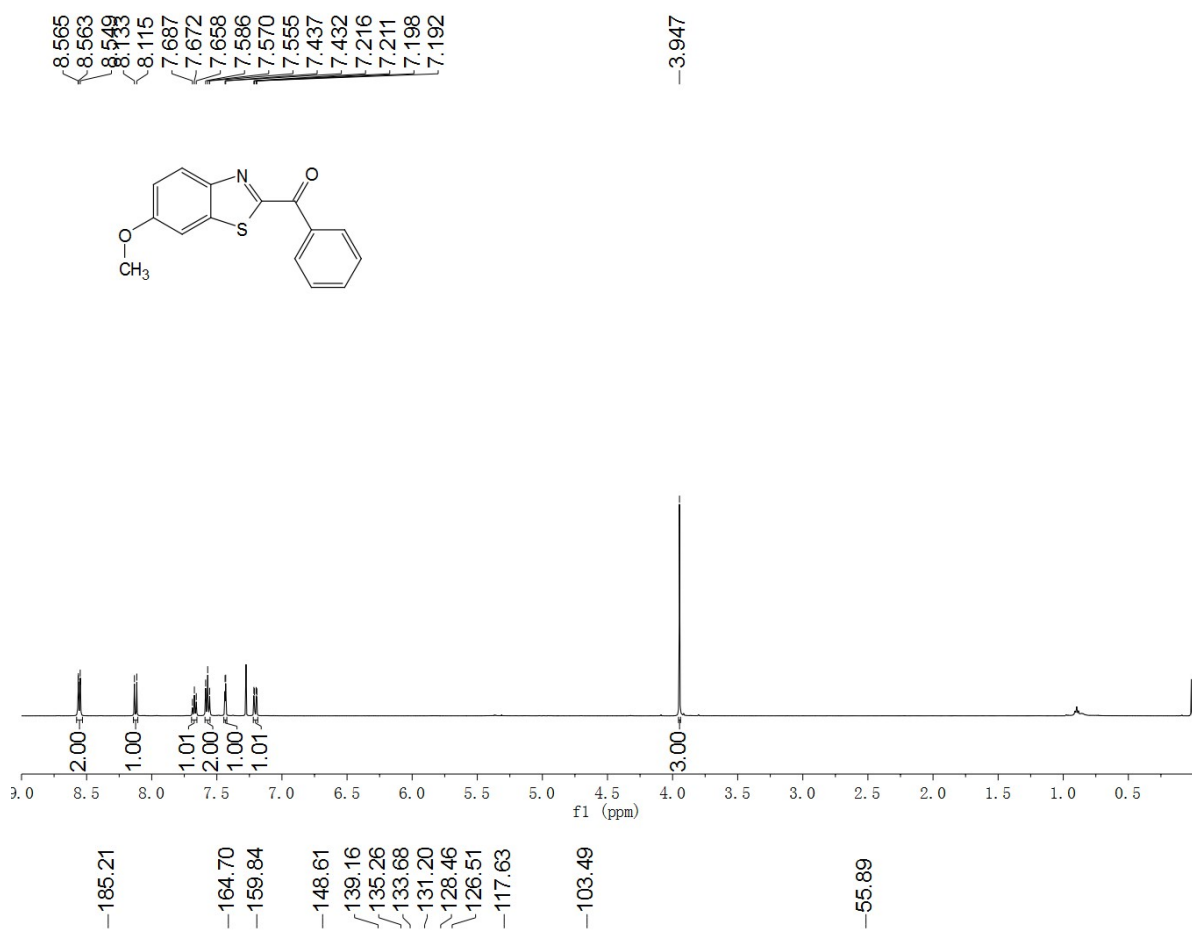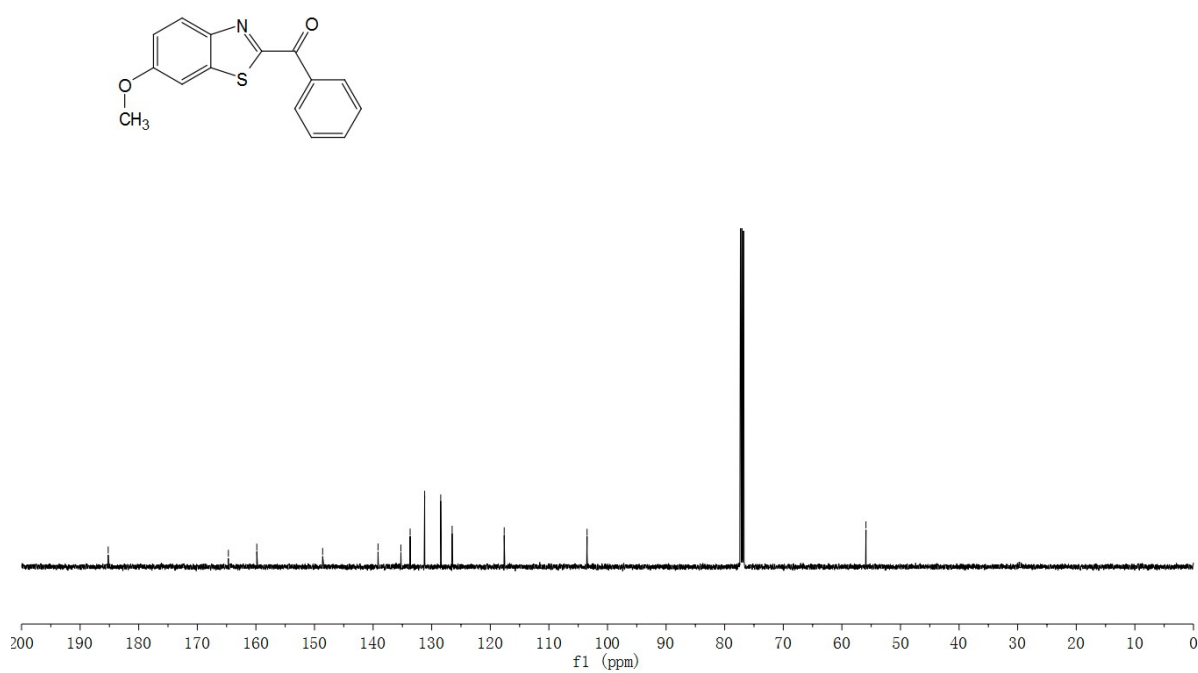

# <sup>1</sup>H and <sup>13</sup>C NMR Spectra of 3bb

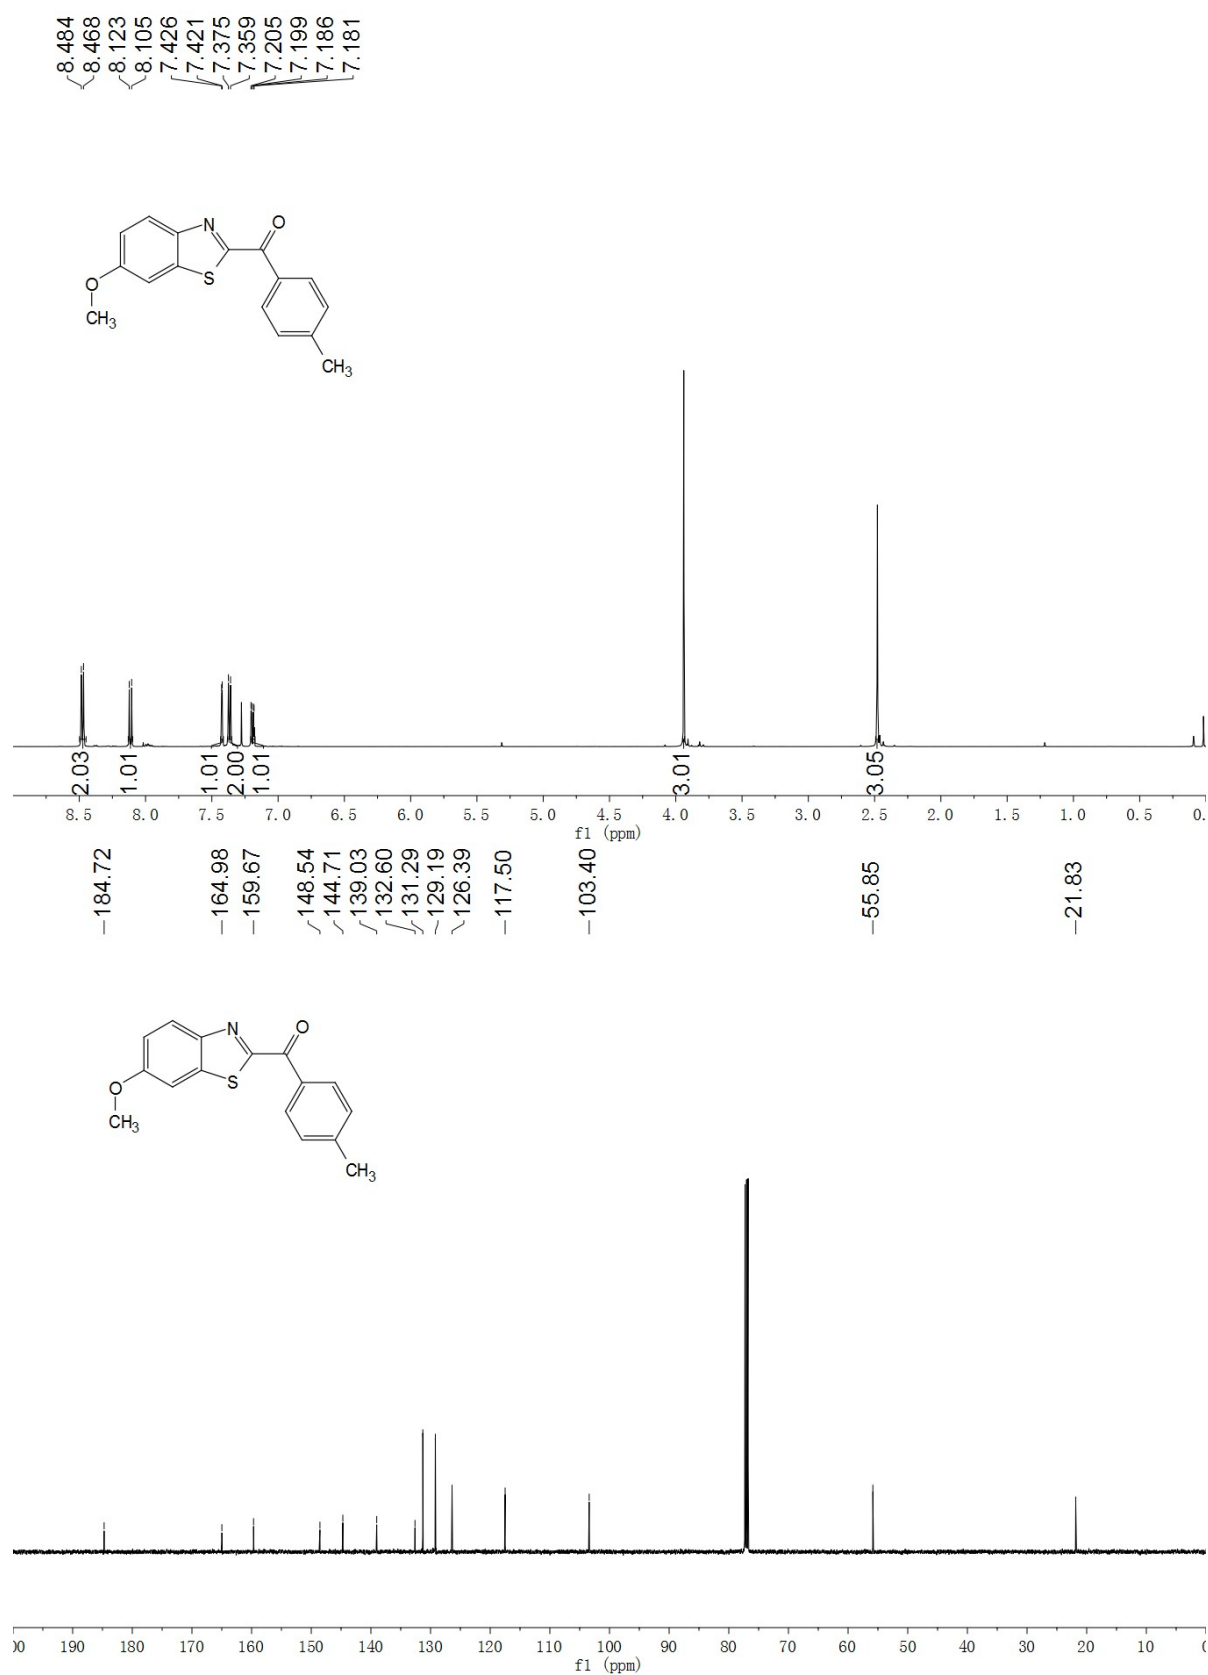

# <sup>1</sup>H and <sup>13</sup>C NMR Spectra of 3bc

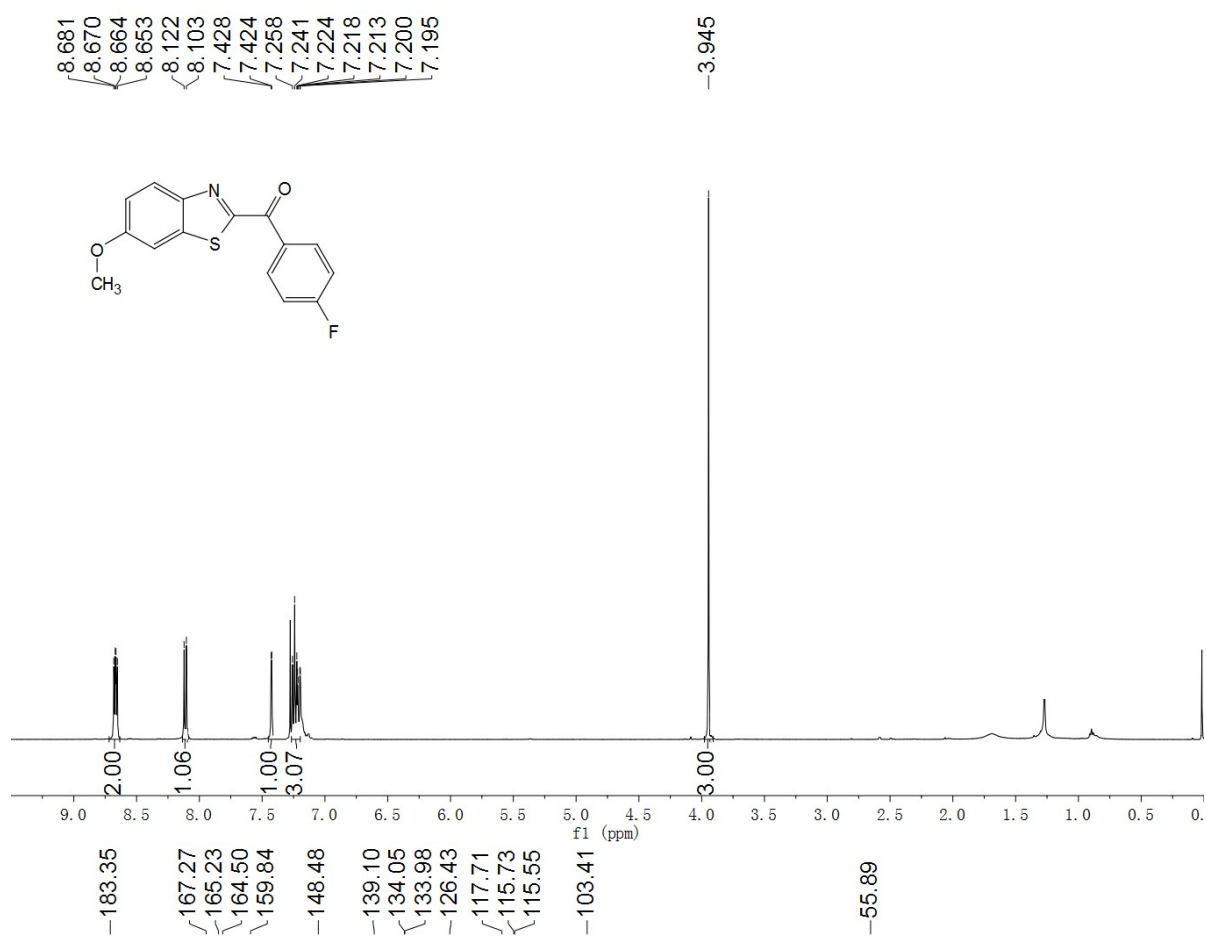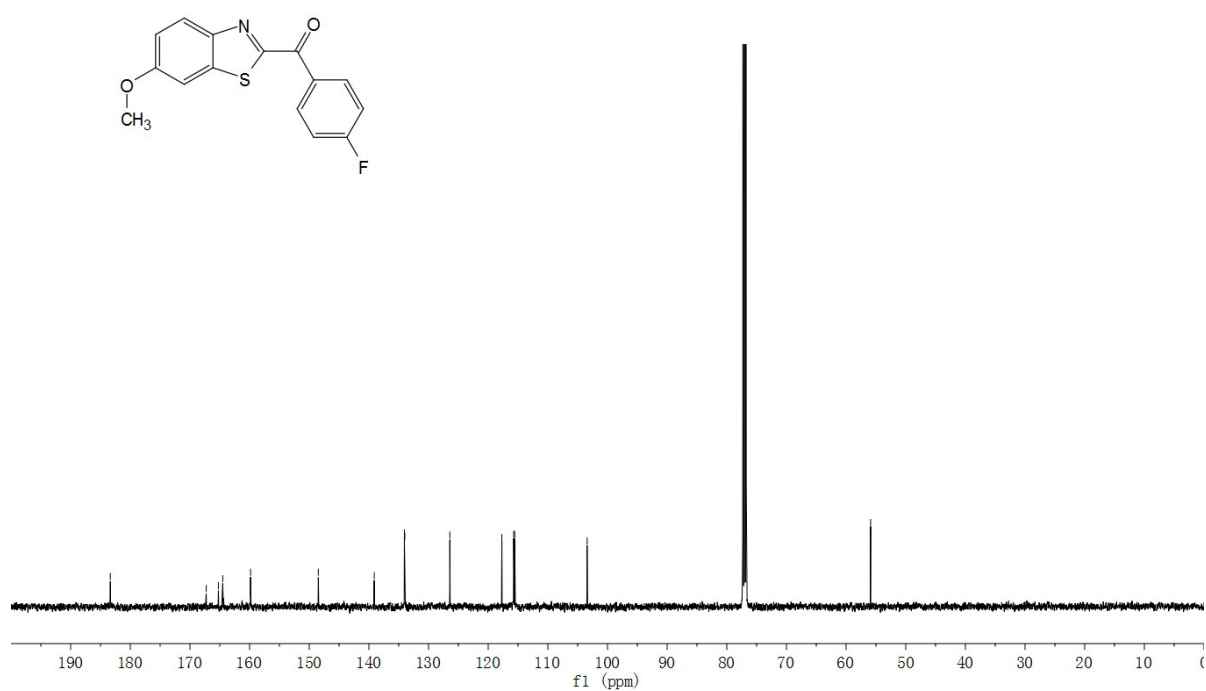



# <sup>1</sup>H and <sup>13</sup>C NMR Spectra of 3bd

8.571  
8.566  
8.563  
8.553  
8.549  
8.544  
8.128  
8.110  
7.560  
7.556  
7.552  
7.542  
7.538  
7.534  
7.436  
7.431  
7.226  
7.221  
7.208  
7.203

3.952

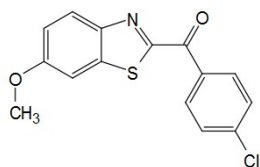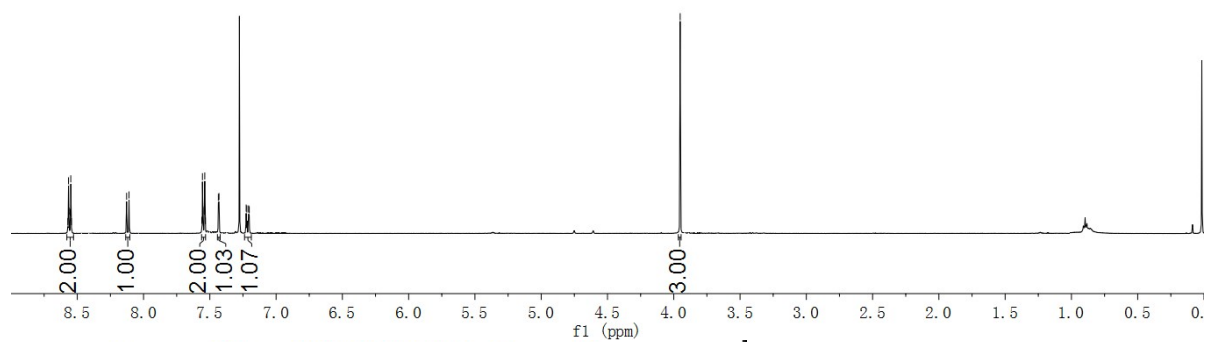

181.31  
164.28  
159.91  
148.48  
140.82  
140.34  
133.29  
132.60  
128.79  
126.50  
117.79  
103.39

55.88

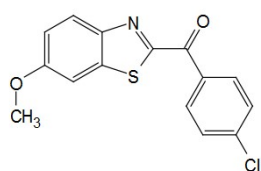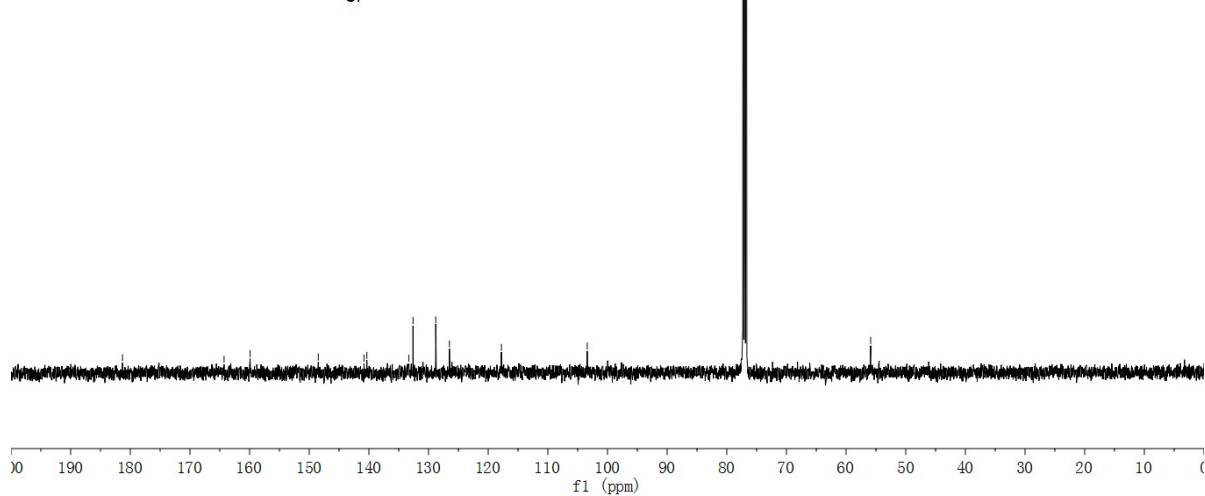

# <sup>1</sup>H and <sup>13</sup>C NMR Spectra of 3be

8.477  
8.459  
8.125  
8.107  
7.723  
7.706  
7.434  
7.429  
7.225  
7.220  
7.206  
7.201

3.951

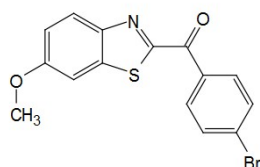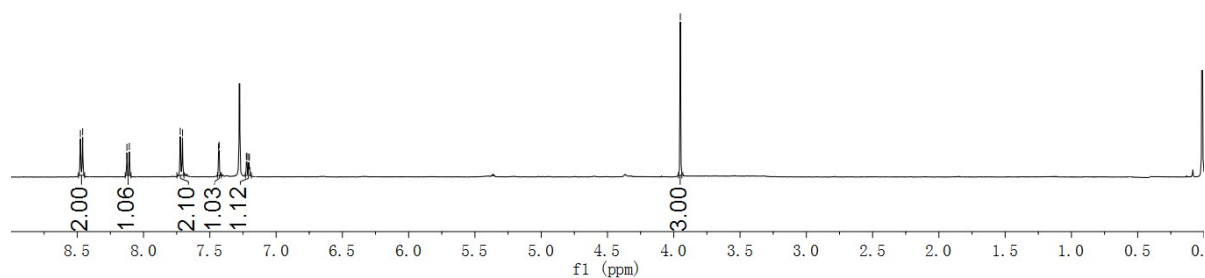

181.47  
164.14  
159.94  
148.61  
139.22  
133.91  
132.68  
131.79  
128.60  
126.52  
117.81  
103.39

55.88

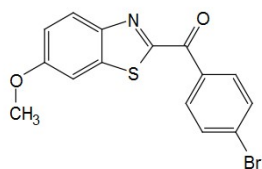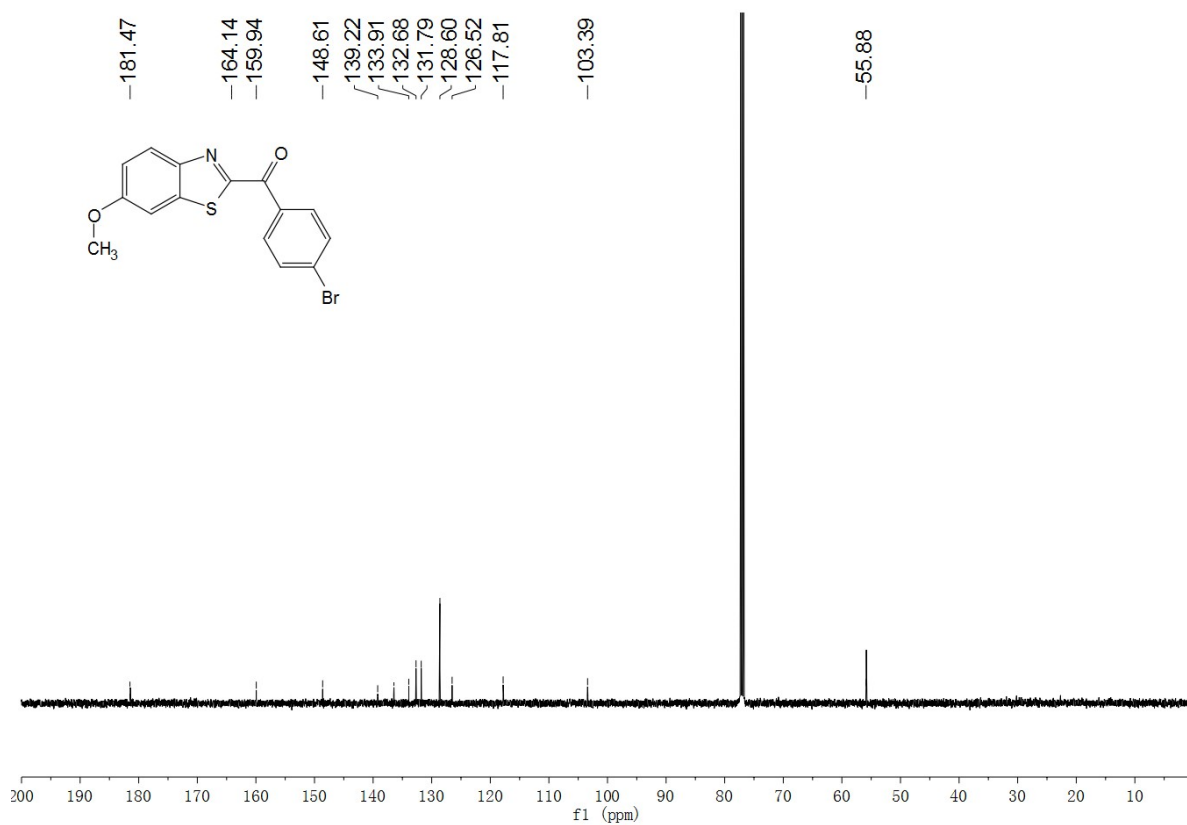

# <sup>1</sup>H and <sup>13</sup>C NMR Spectra of 3bf

8.304  
8.301  
8.291  
8.287  
8.122  
8.104  
7.949  
7.945  
7.935  
7.931  
7.432  
7.428  
7.223  
7.218  
7.205  
7.200

3.950

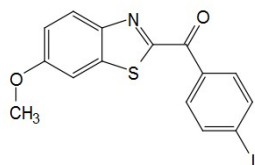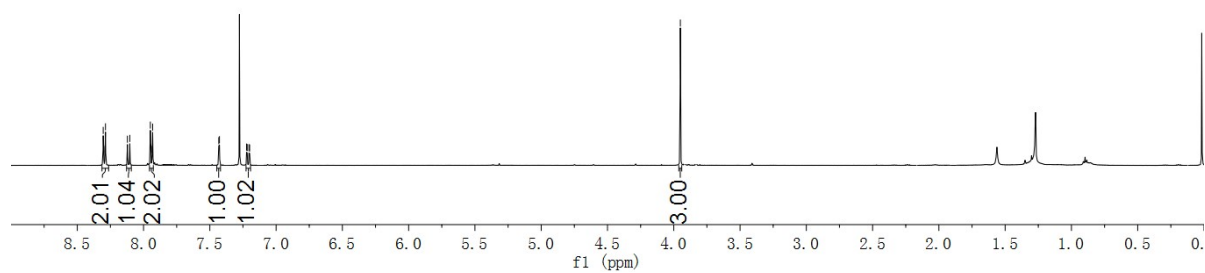

184.38  
163.07  
159.92  
148.62  
145.50  
144.12  
142.39  
137.79  
132.47  
126.52  
117.80

103.39  
99.99

55.88

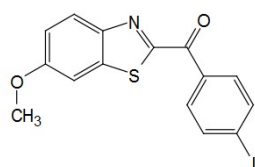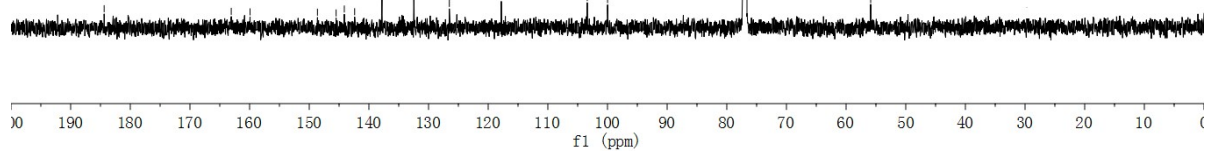

# <sup>1</sup>H and <sup>13</sup>C NMR Spectra of 3bg

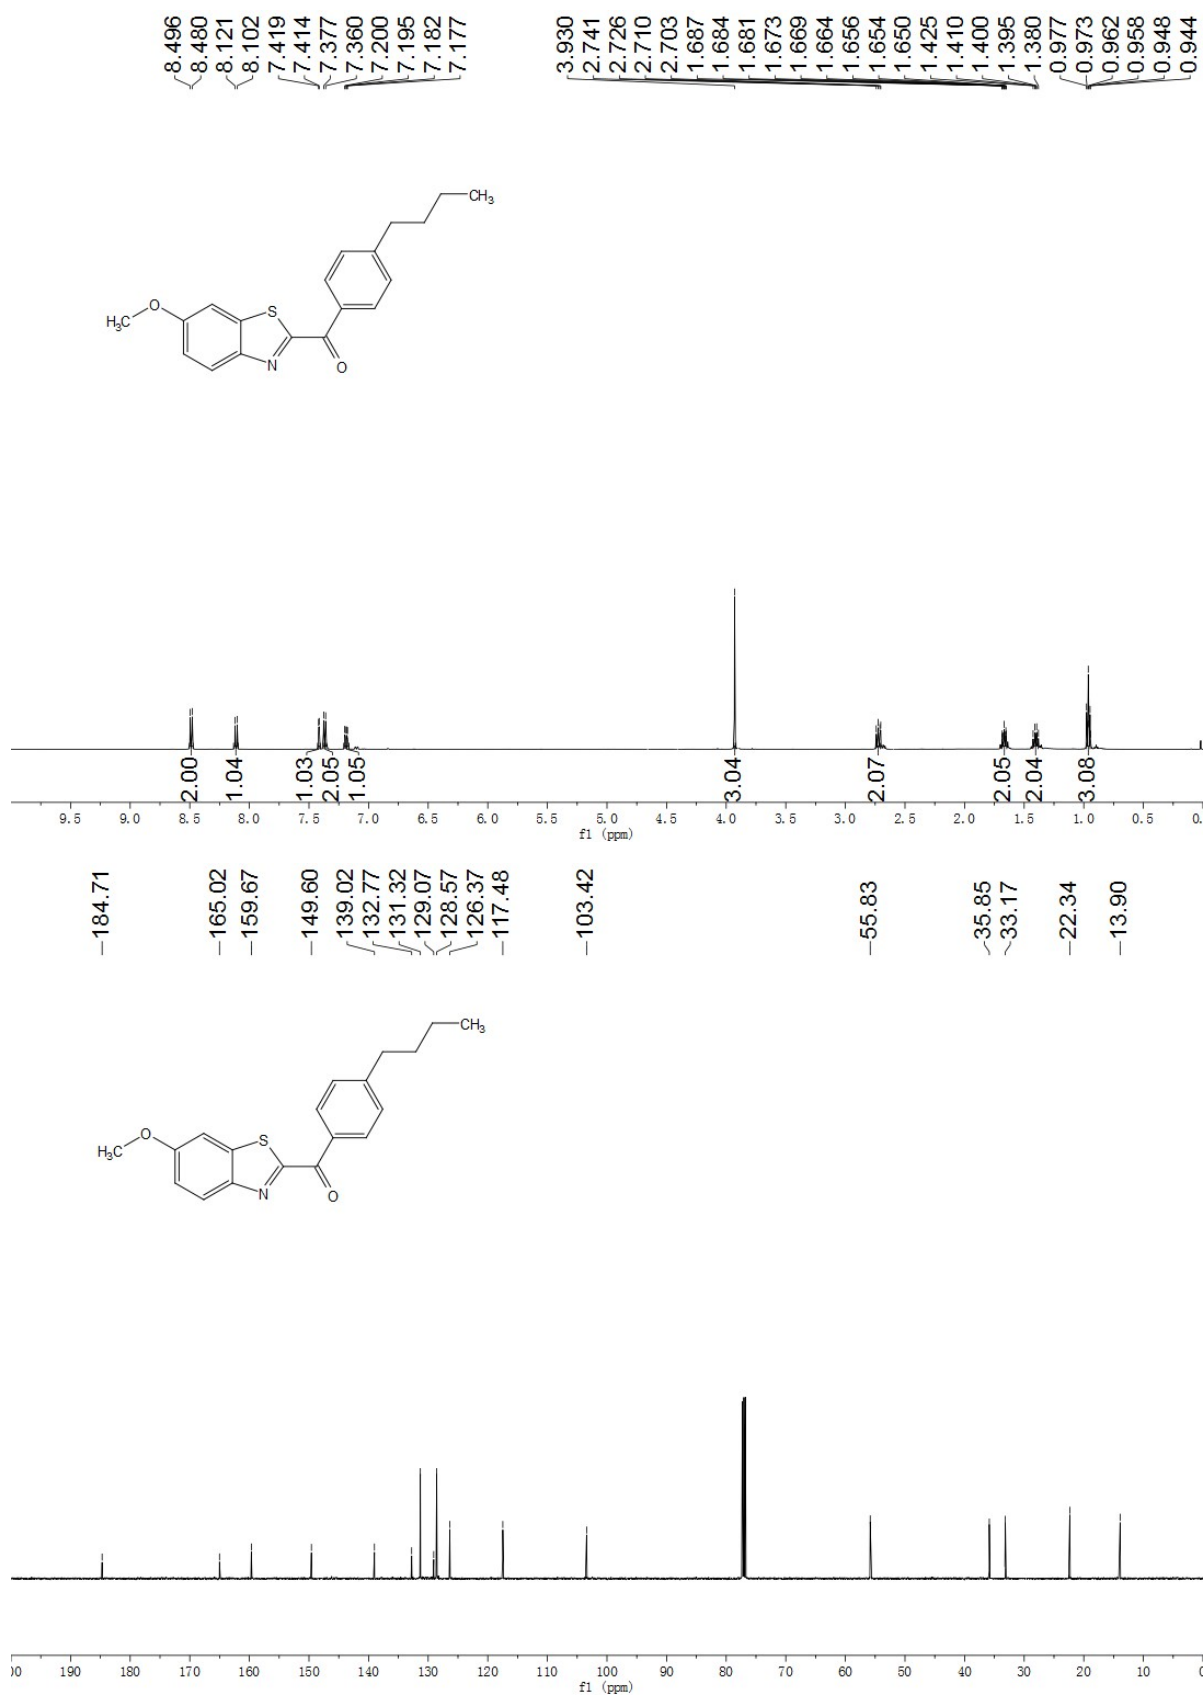

# <sup>1</sup>H and <sup>13</sup>C NMR Spectra of 3bh

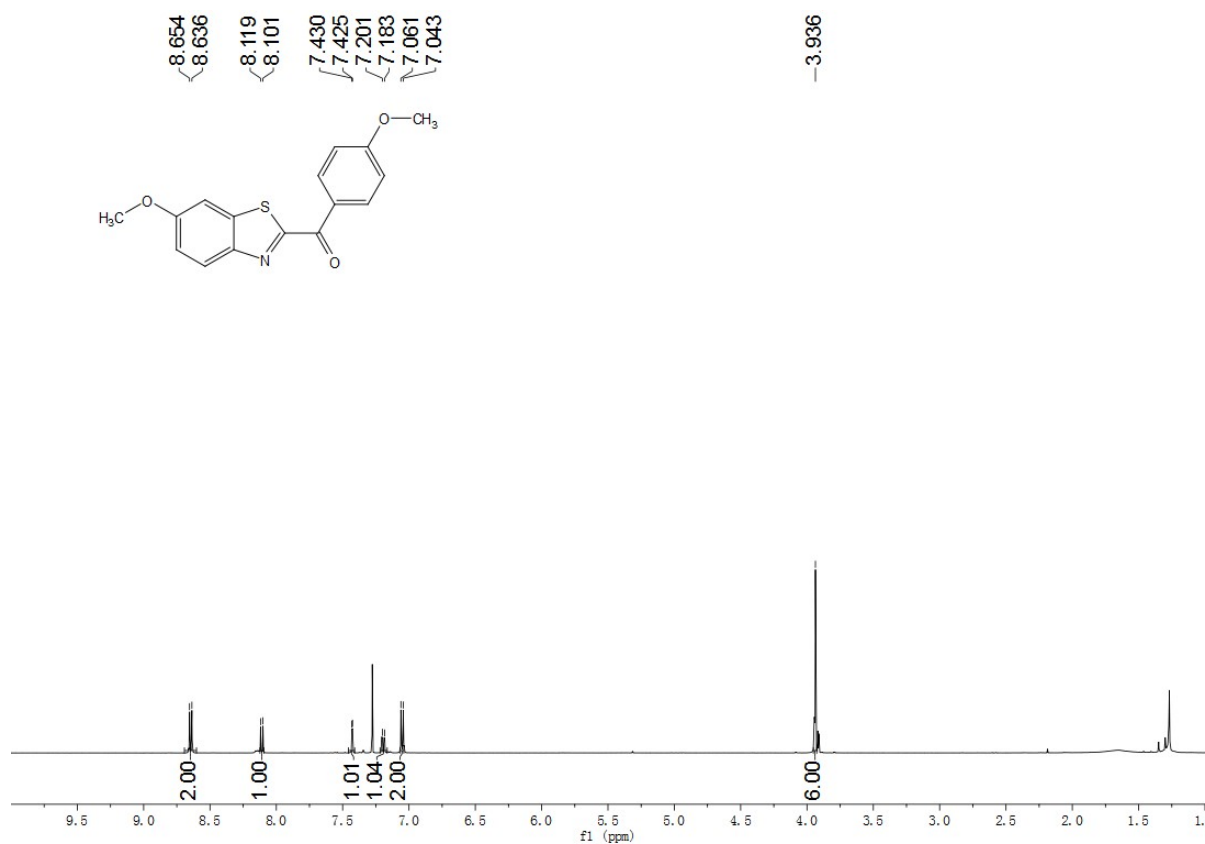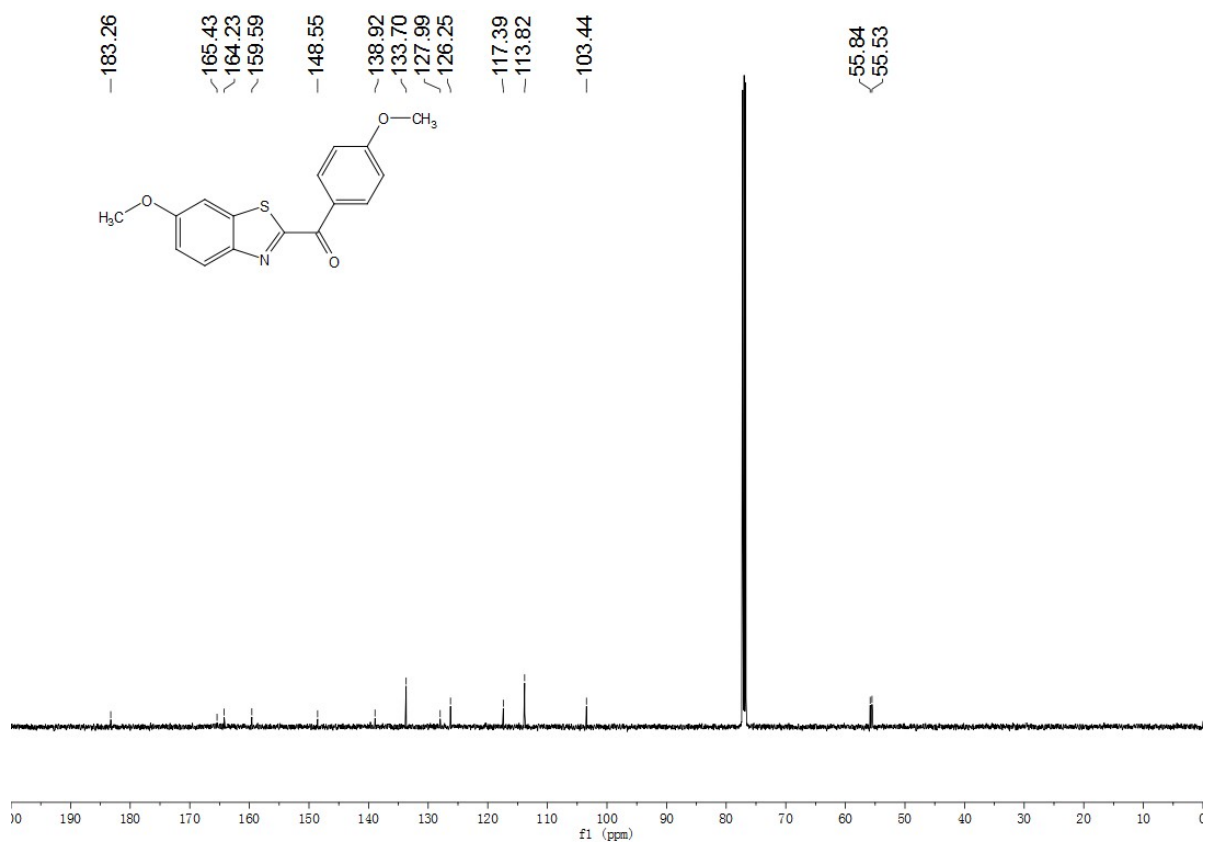

# <sup>1</sup>H and <sup>13</sup>C NMR Spectra of 3bi

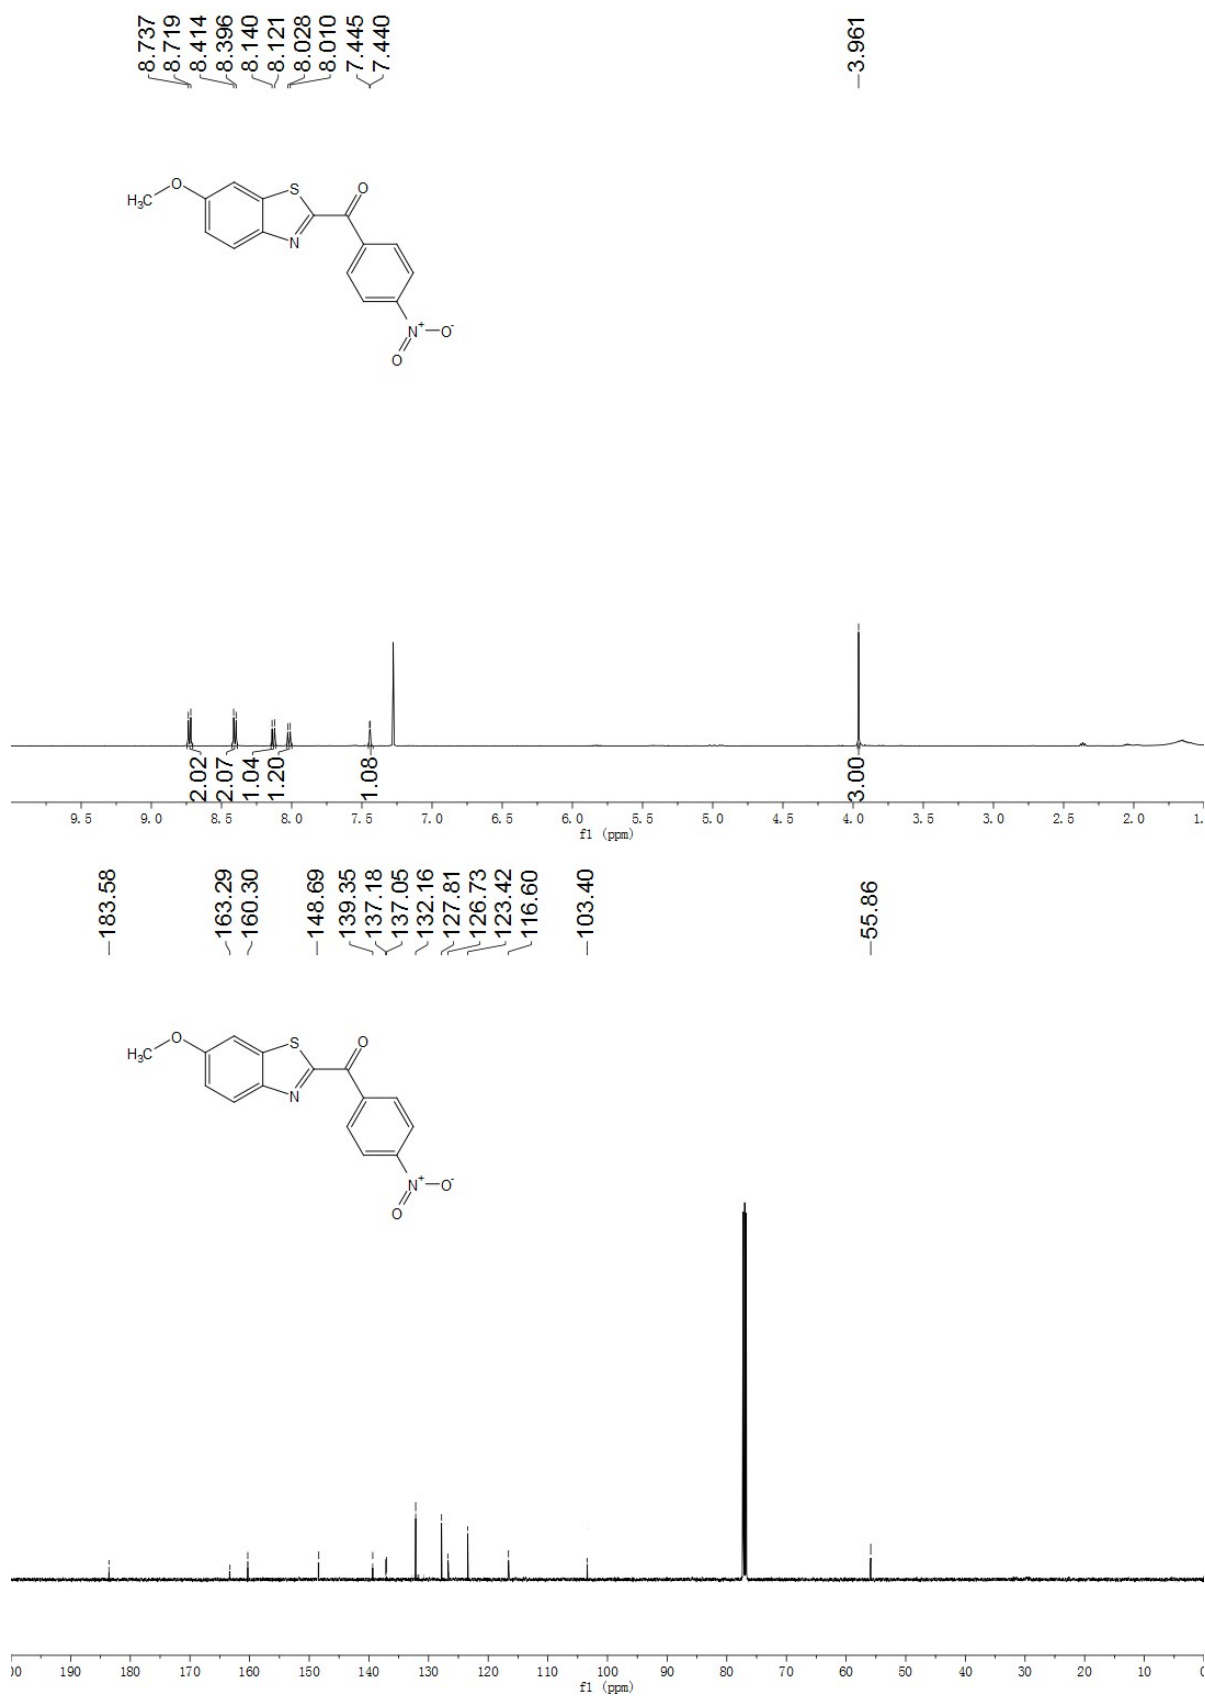

# <sup>1</sup>H and <sup>13</sup>C NMR Spectra of 3bj

8.577  
8.562  
8.560  
8.259  
8.255  
7.963  
7.946  
7.716  
7.701  
7.686  
7.599  
7.583  
7.568  
7.551  
7.547  
7.534  
7.530

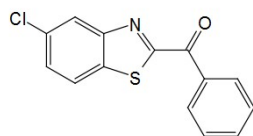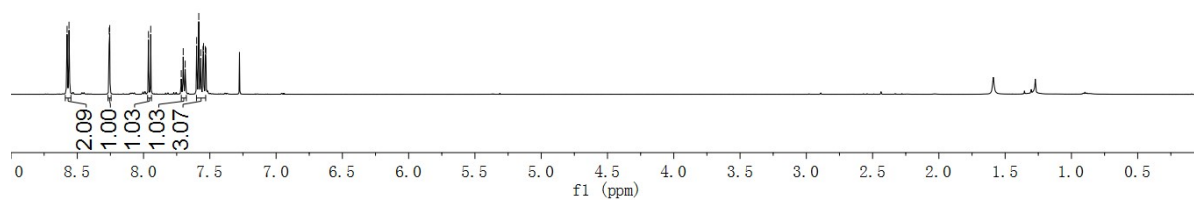

184.94  
168.98  
154.66  
135.26  
134.72  
134.14  
133.06  
131.33  
128.59  
128.26  
125.28  
122.98

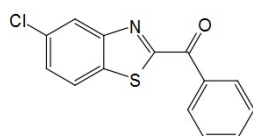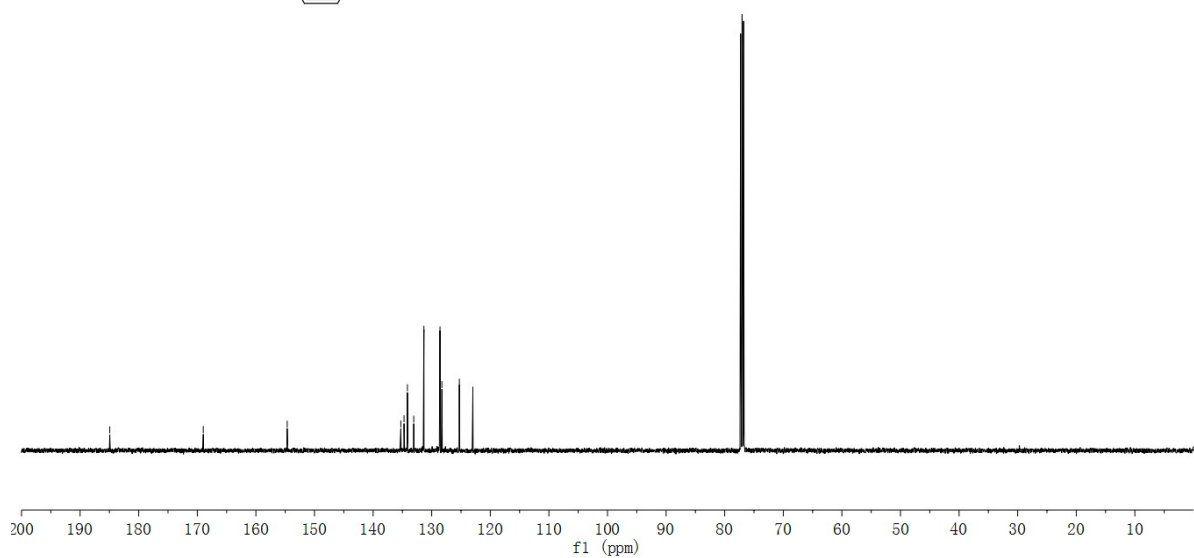

# <sup>1</sup>H and <sup>13</sup>C NMR Spectra of 3bk

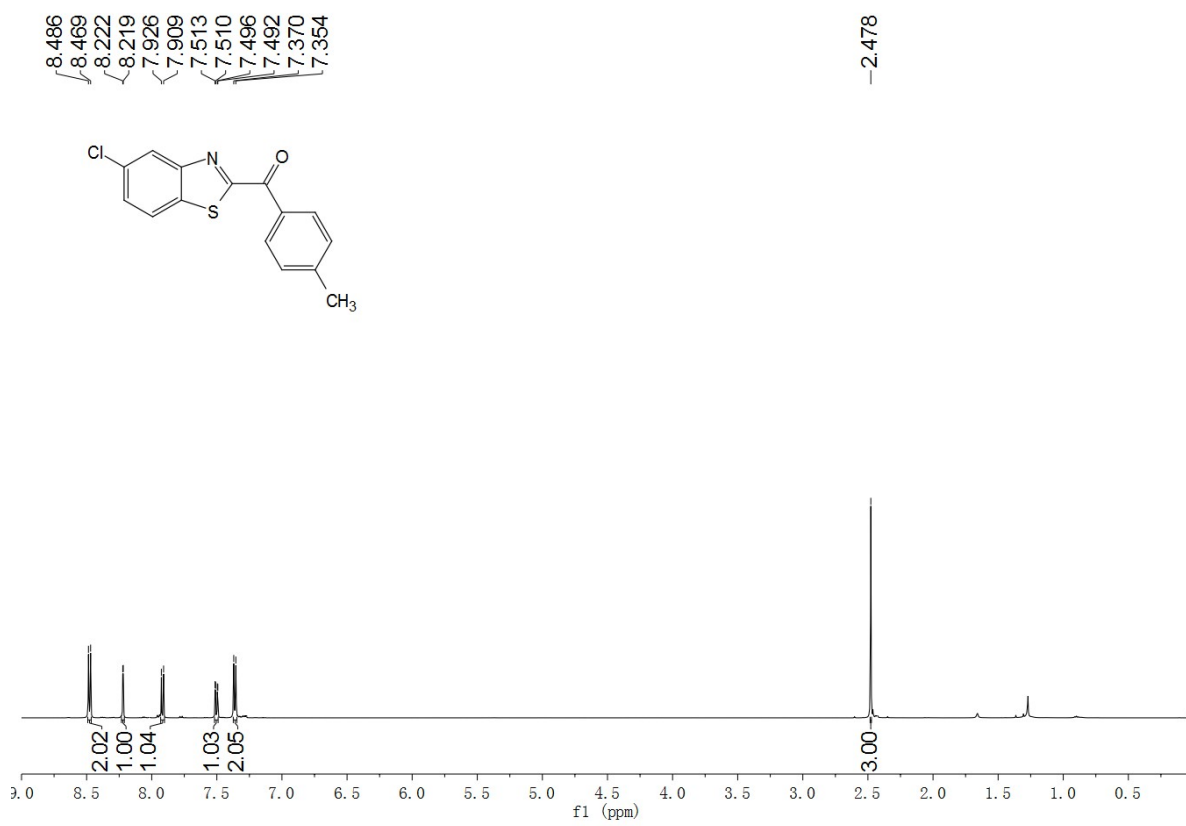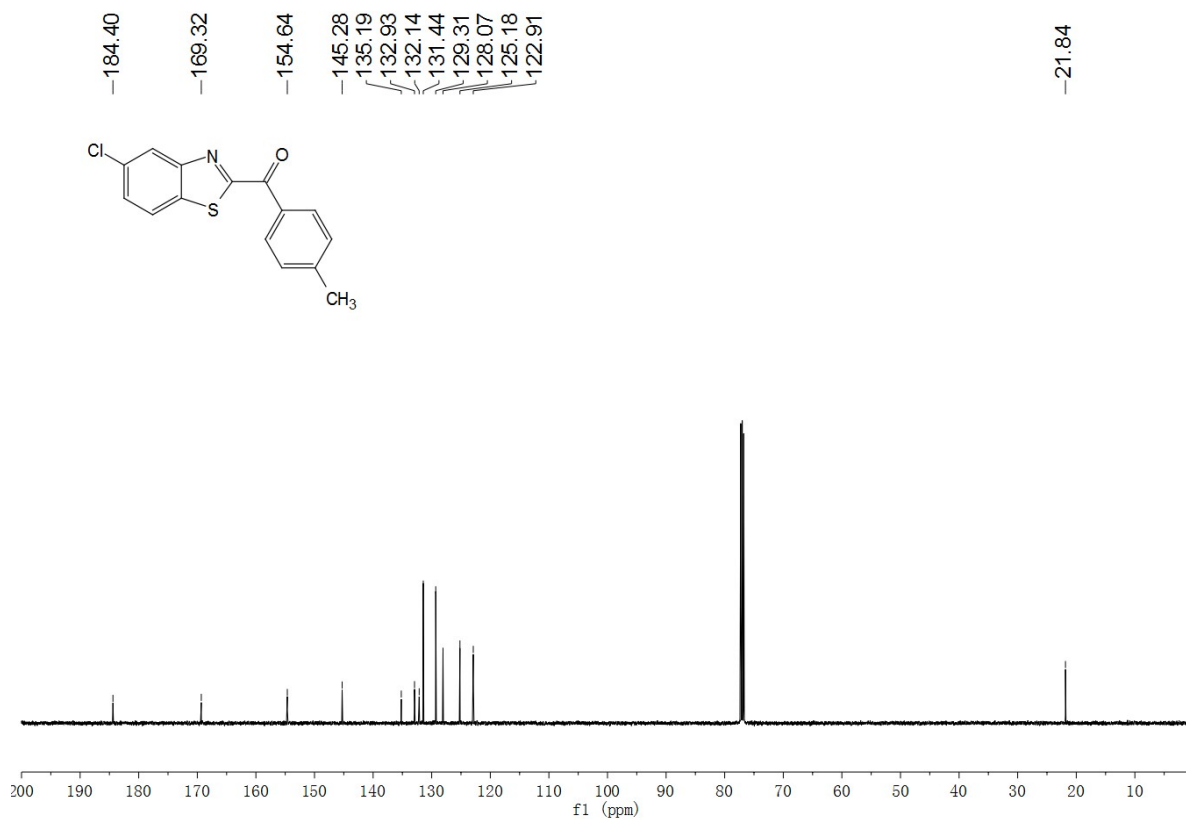



# <sup>1</sup>H and <sup>13</sup>C NMR Spectra of 3bl

8.70  
8.69  
8.69  
8.68  
8.67  
8.66  
8.26  
8.25  
7.97  
7.95  
7.56  
7.56  
7.54  
7.54  
7.26  
7.24

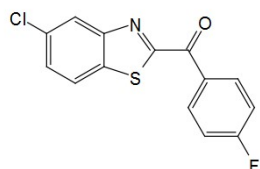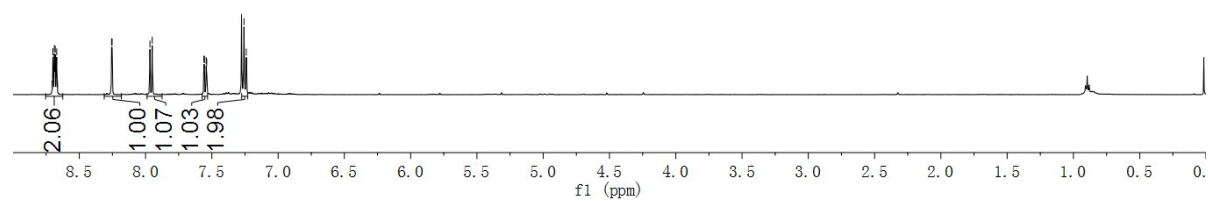

183.15  
168.89  
165.55  
154.60  
135.24  
134.28  
134.21  
133.15  
128.35  
125.25  
122.99  
115.94  
115.76

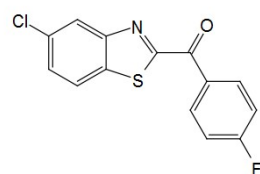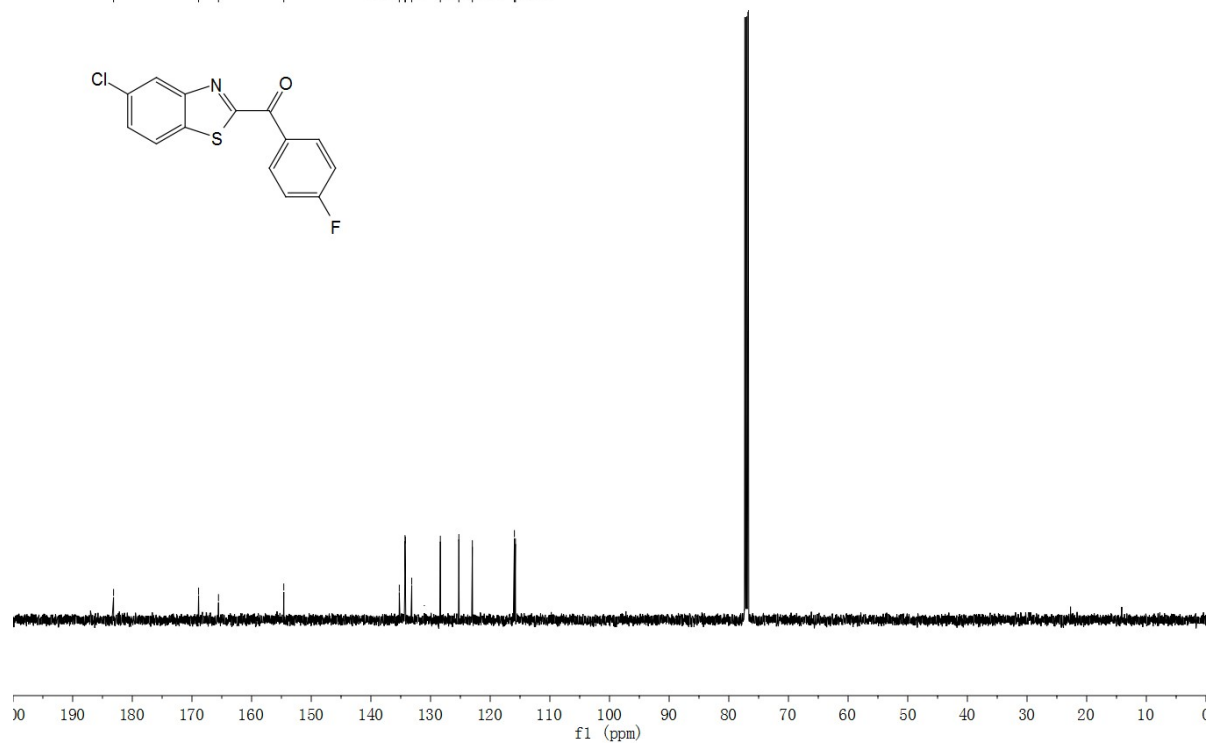

# <sup>1</sup>H and <sup>13</sup>C NMR Spectra of 3bm

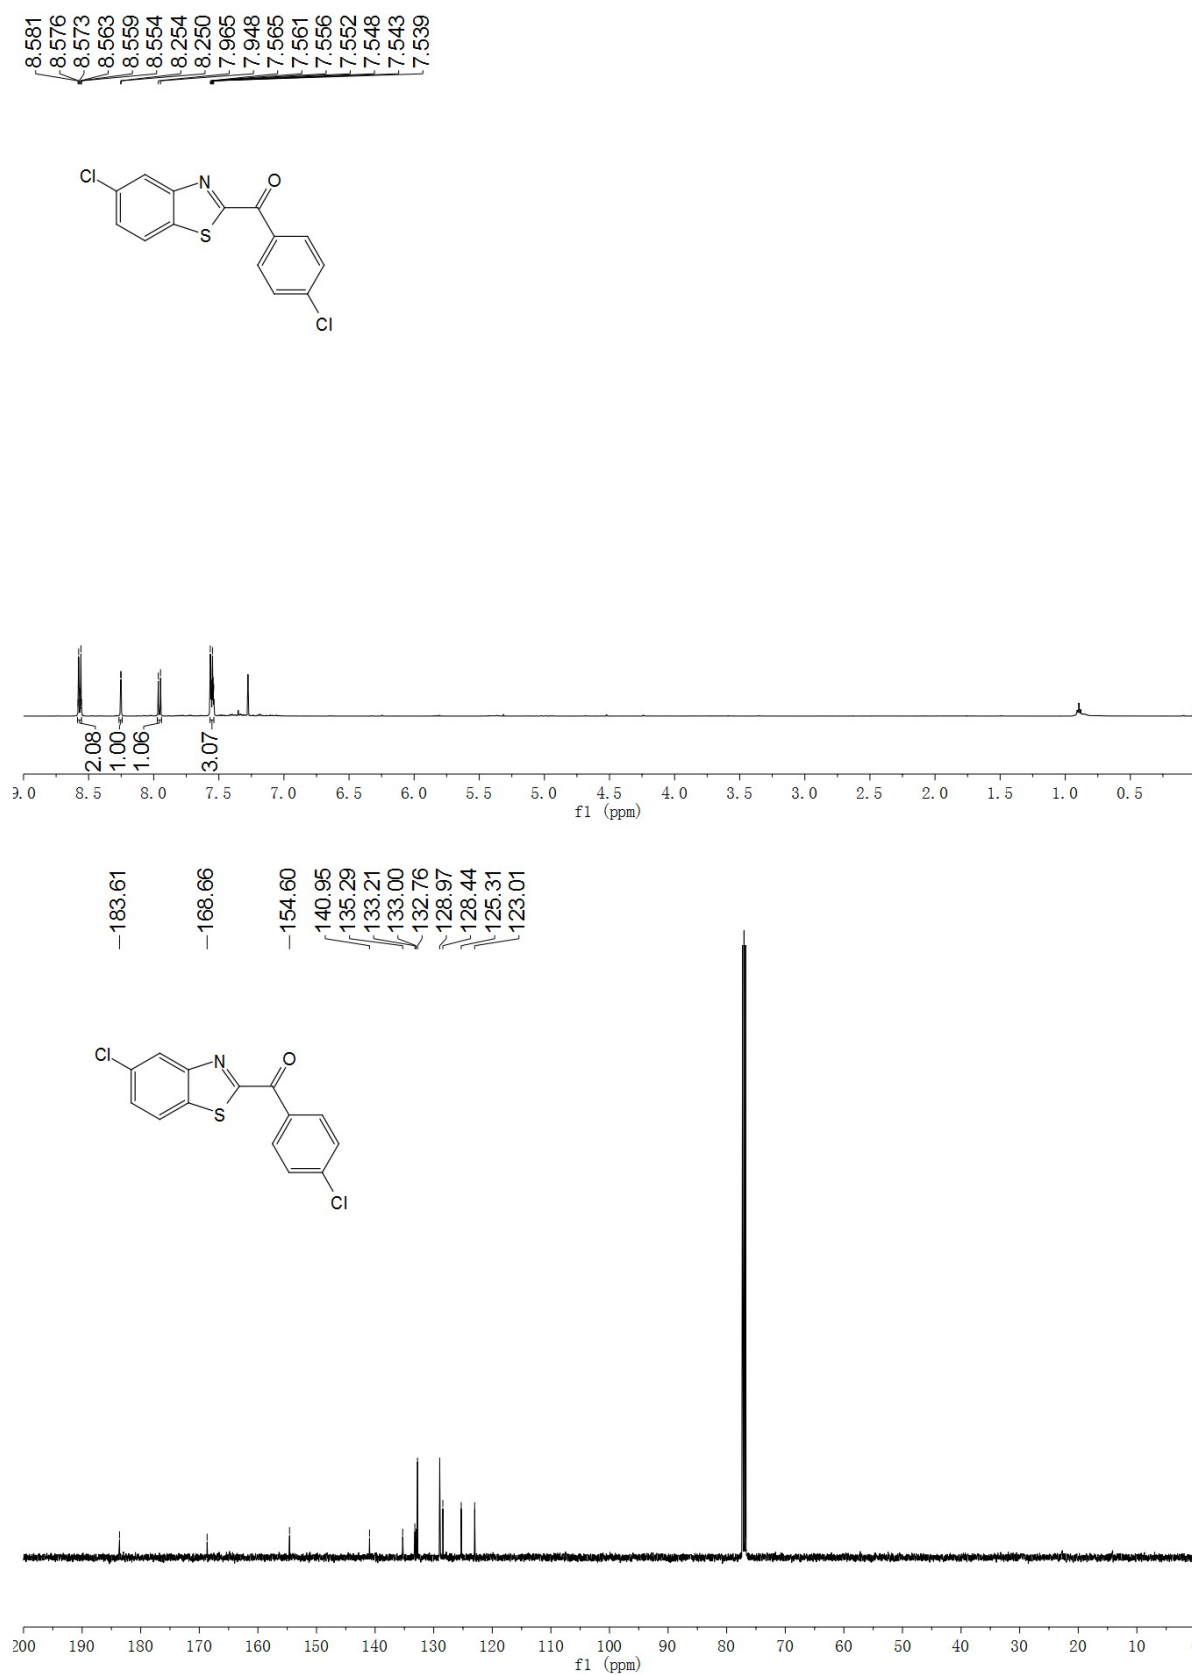

# <sup>1</sup>H and <sup>13</sup>C NMR Spectra of 3bn

8.494  
8.490  
8.486  
8.476  
8.472  
8.468  
8.255  
8.251  
7.967  
7.949  
7.741  
7.736  
7.733  
7.723  
7.719  
7.715  
7.563  
7.559  
7.546  
7.542

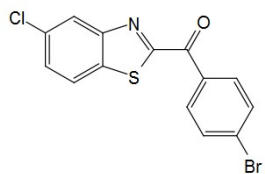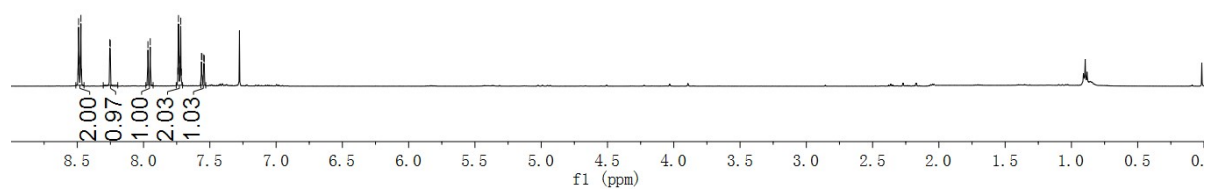

183.83  
168.60  
154.59  
135.29  
133.41  
133.22  
132.79  
131.96  
129.83  
128.45  
125.31  
123.00

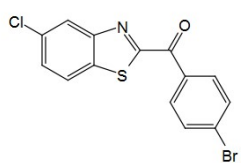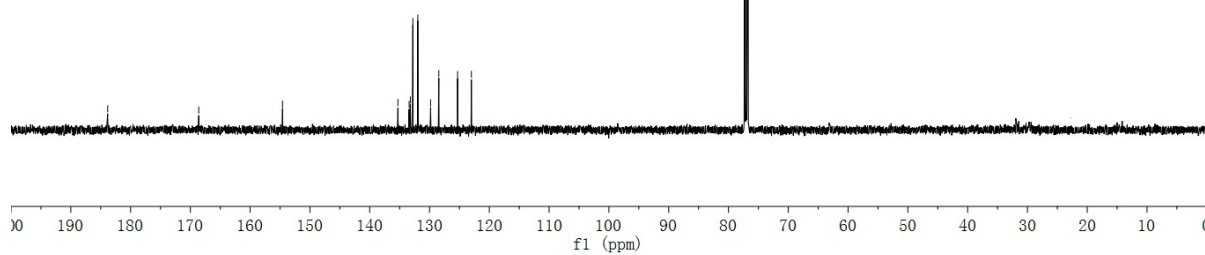

# <sup>1</sup>H and <sup>13</sup>C NMR Spectra of 3bo

8.321  
8.316  
8.313  
8.303  
8.299  
8.295  
8.254  
8.250  
7.952  
7.948  
7.714  
7.710  
7.706  
7.697  
7.693  
7.689  
7.565  
7.561  
7.548  
7.544

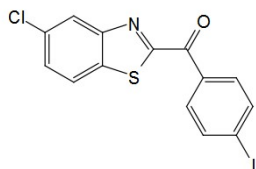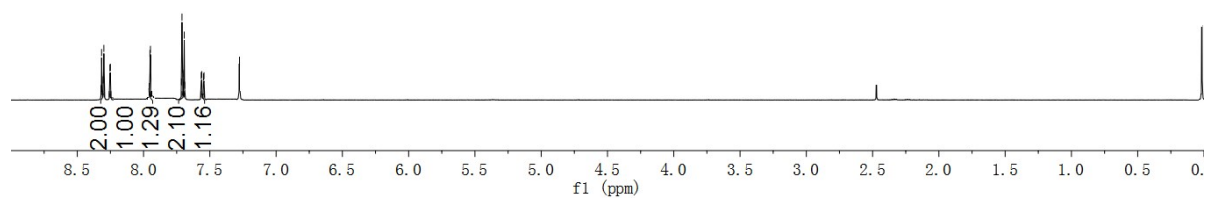

183.45  
169.19  
154.55  
135.26  
133.91  
133.17  
132.71  
131.90  
130.93  
128.42  
125.28  
122.99

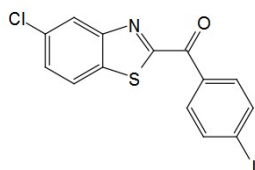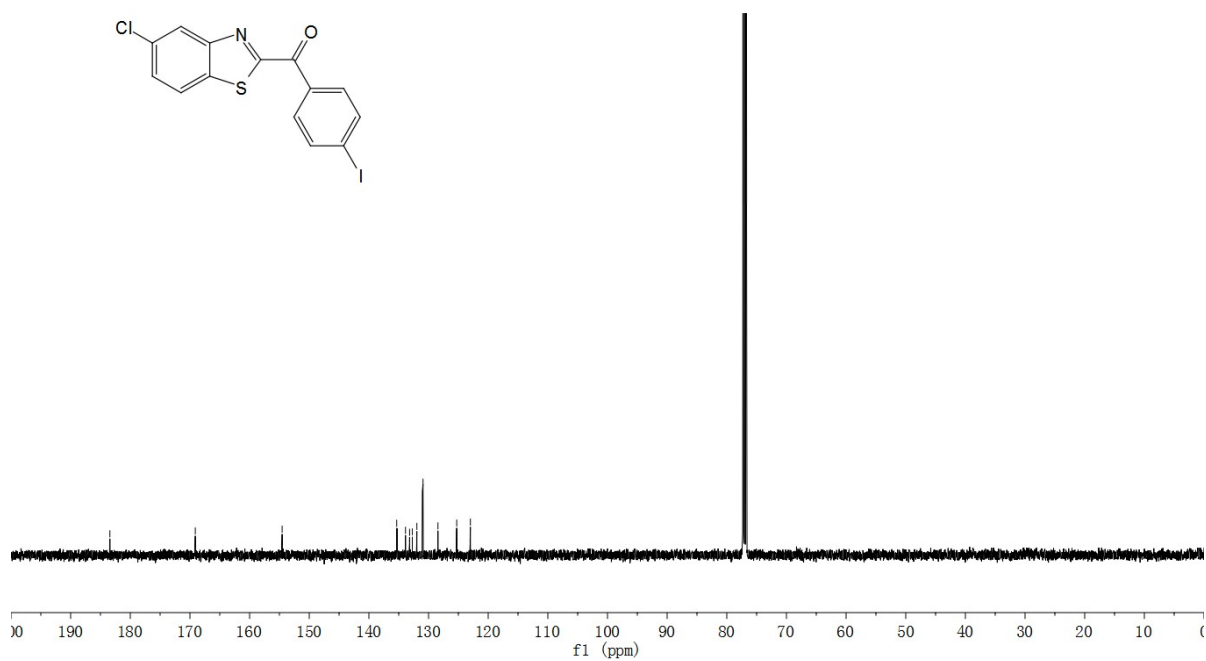

# <sup>1</sup>H and <sup>13</sup>C NMR Spectra of 3bp

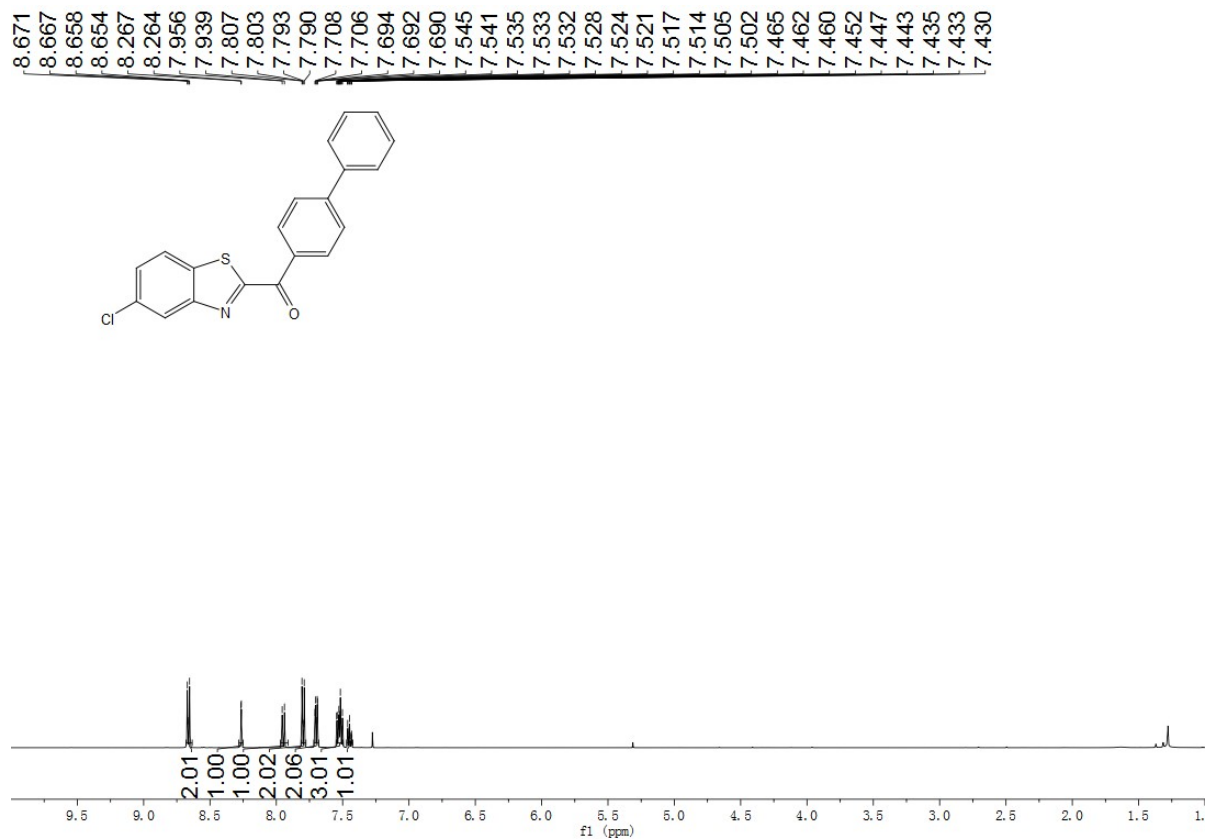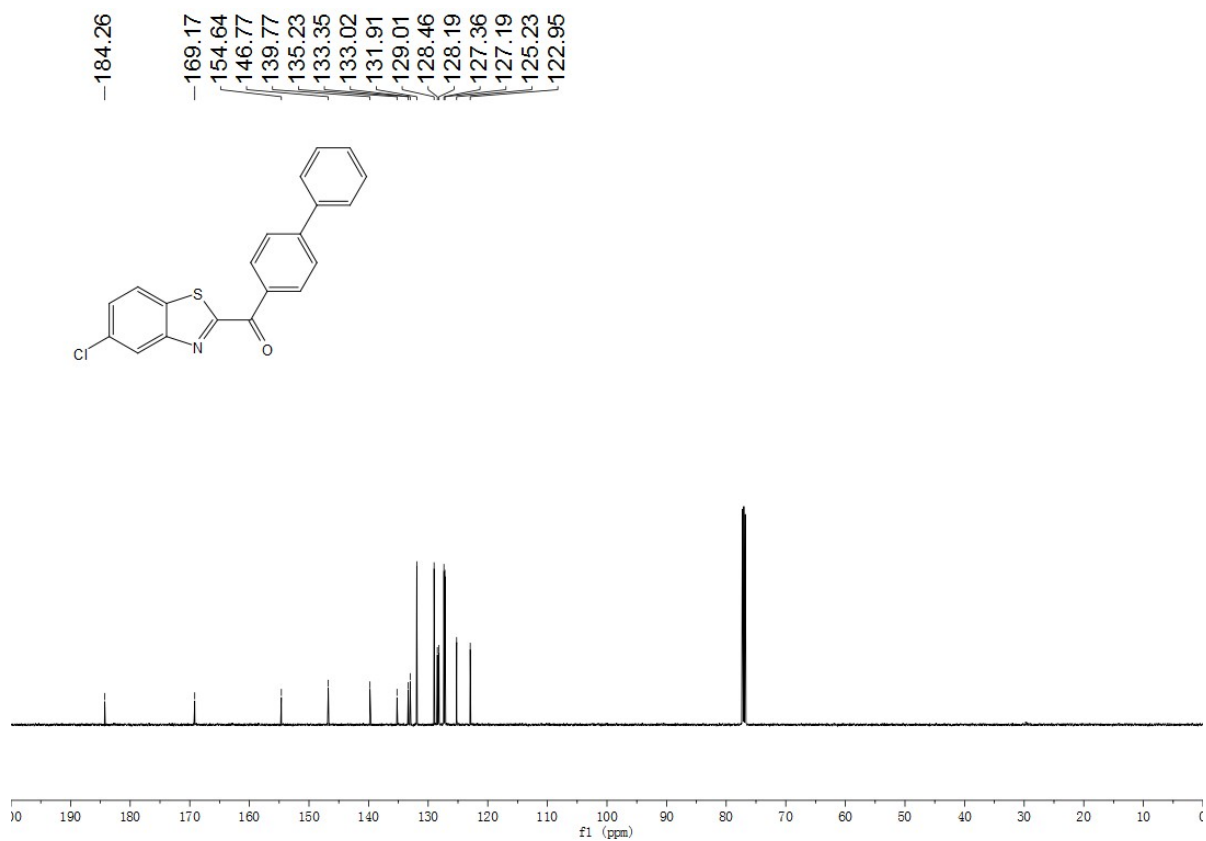

# <sup>1</sup>H and <sup>13</sup>C NMR Spectra of 3bq

8.986  
8.982  
8.614  
8.613  
8.598  
8.596  
8.481  
8.476  
8.463  
8.458  
8.394  
8.376  
7.751  
7.736  
7.721  
7.627  
7.611  
7.595

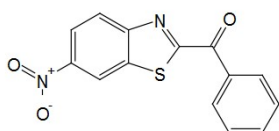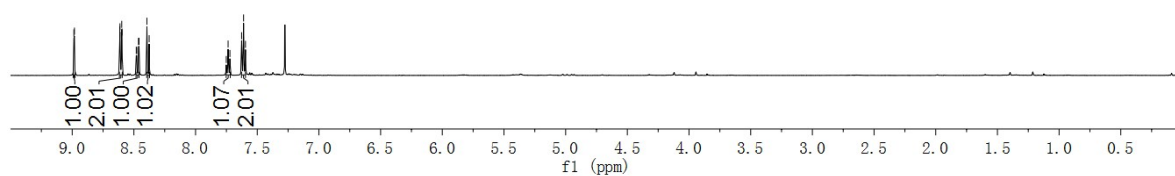

-191.14  
-172.44  
-157.19  
-146.61  
-137.14  
-134.59  
-134.26  
-131.41  
-128.75  
-126.24  
-122.08  
-118.86

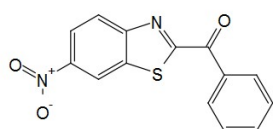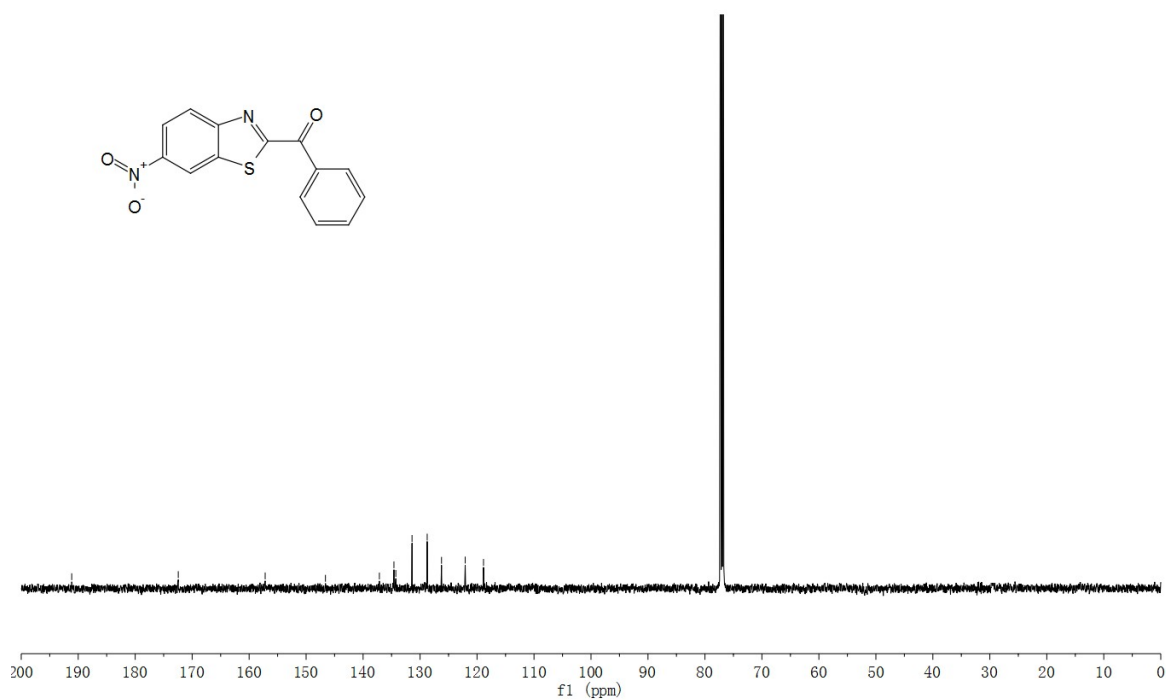

# <sup>1</sup>H and <sup>13</sup>C NMR Spectra of 3br

8.597  
8.583  
8.399  
8.397  
8.361  
8.344  
7.855  
7.852  
7.838  
7.834  
7.742  
7.727  
7.712  
7.618  
7.602  
7.587

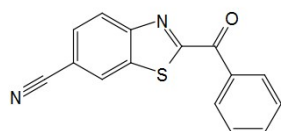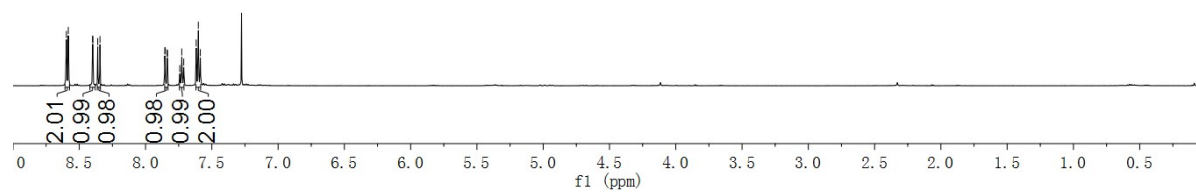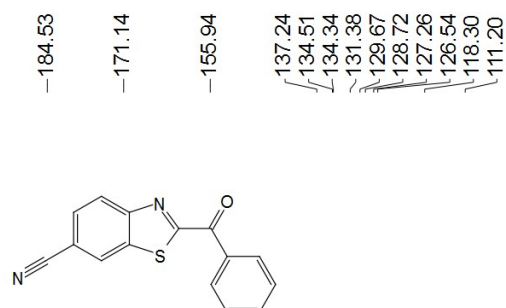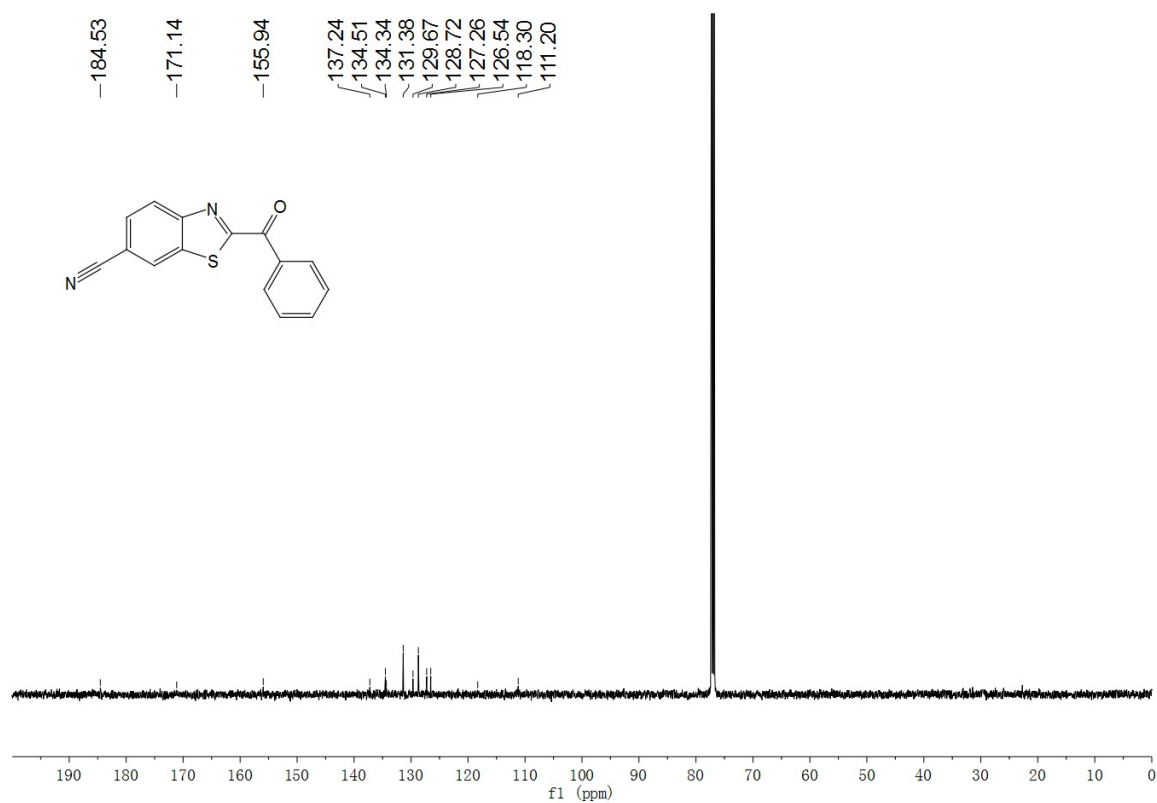

## 2. NMR Spectrum of 1b

2-Aminobenzenethiol (*1b*): Yellow solid; yield 83% (31 mg); m.p.: 70-71 °C;  $^1\text{H}$  NMR (500 MHz,  $\text{cdCl}_3$ )  $\delta$  7.19 – 7.16 (m, 2H), 6.73 (dd,  $J = 8.0, 1.0\text{ Hz}$ , 1H), 6.61 (td,  $J = 7.5, 1.5\text{ Hz}$ , 1H), 4.17 (s, 3H);  $^{13}\text{C}$  NMR (125 MHz,  $\text{CDCl}_3$ )  $\delta$  148.59, 136.83, 131.60, 118.80, 118.28, 115.27.

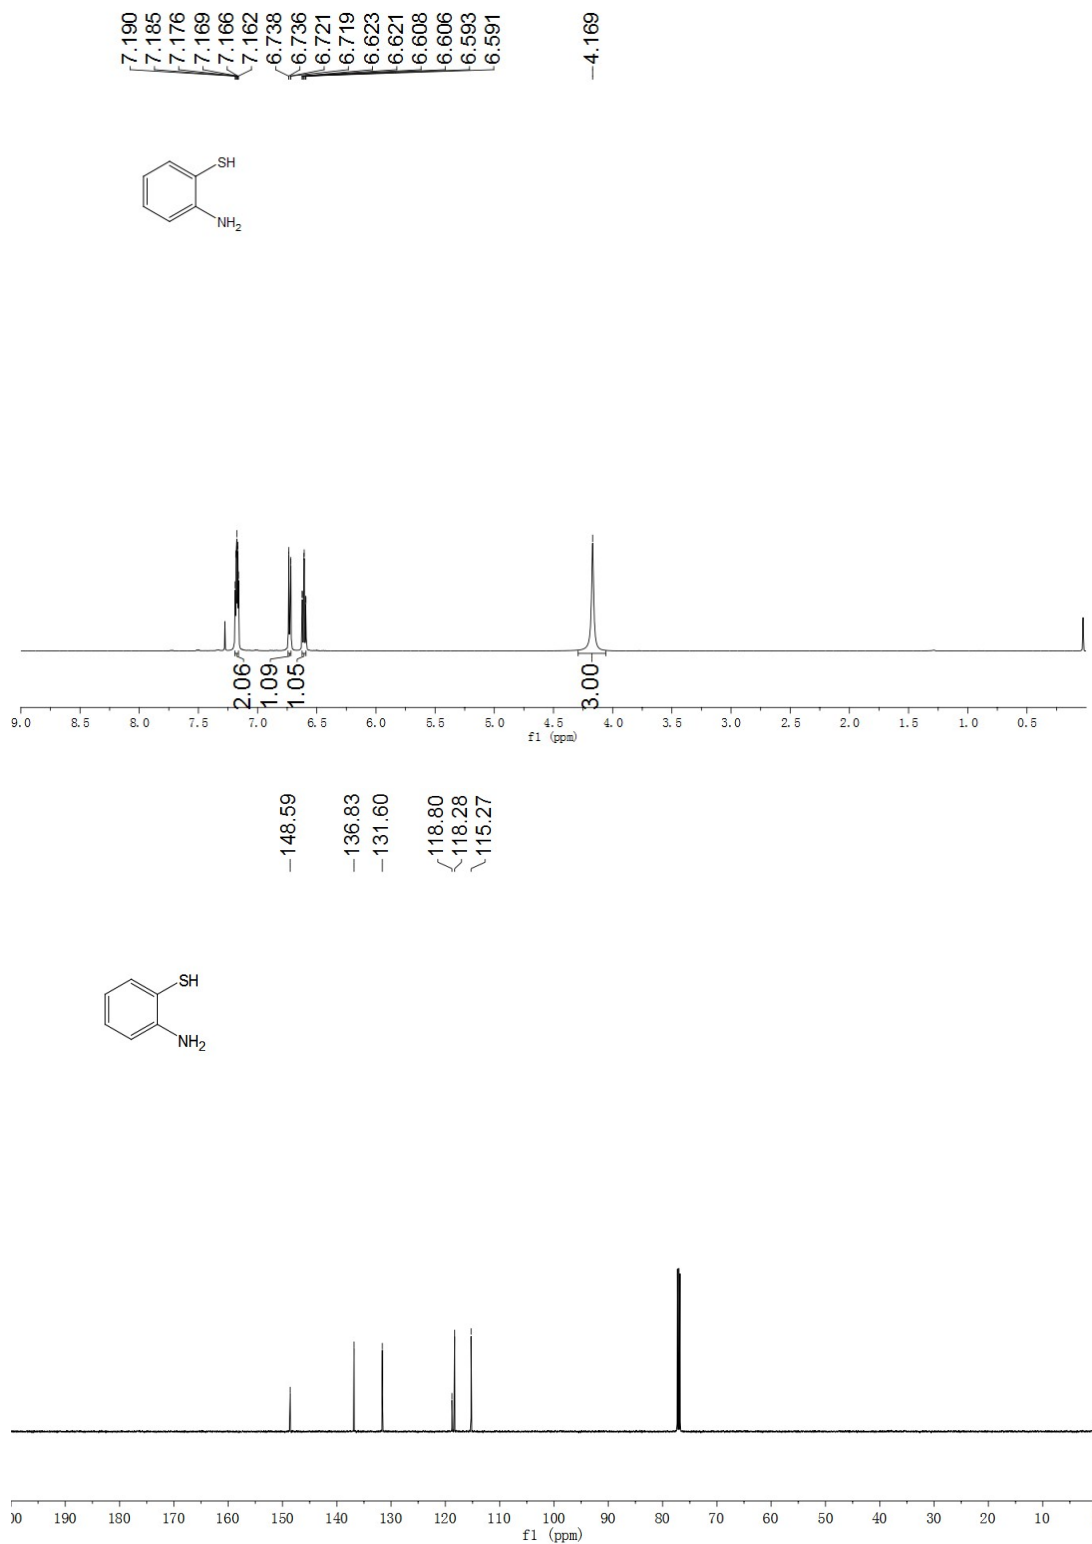



### 3. GC-MS Spectrum of PhI

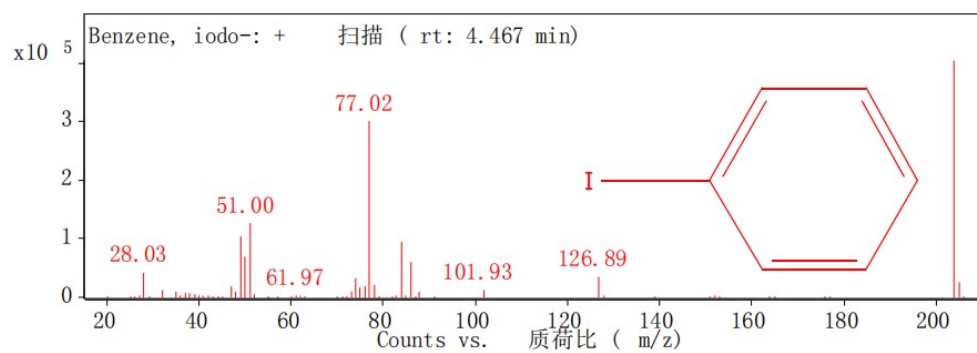

质谱图结构

Benzenes, iodo-

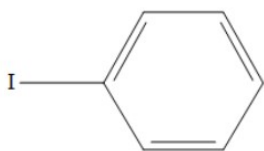

Supplement: s1 [file s1]
